# Supplementary material
Source: MDPI journal article supplement (https://www.mdpi.com/2071-1050/10/2/313)
Supplement: s1 [file s1]

Archive with 2 entries (2 files):
- S1 Complete Dataset.xlsx
- S2 Survey Instrument.pdf
