# Supplementary material
Source: MDPI journal article supplement (https://www.mdpi.com/2071-1050/10/2/313)
Supplement: s1 [file s1 › S1 Complete Dataset.xlsx]

## Sheet: Data
													1a	1b		1c		2	3	4	5	6							7	8a							8b							9					10
ID	Waypoint	Enumerator	Date	Camp	CampV	Gender	GenderV	Dist_Choma	Dist_ISR	Zone_Leader	Zone_LeaderV	Time	Age	Married	MarriedV	Education	EducationV	Years_Farmer	Farming_Here	KG_Seed	Cattle	Rights	RightsV	HeadmanV	InheritedV	PurchasedV	GovtV	RentV	HH_Members	Worries	8a_d1	8a_d2	8a_d3	8a_y1	8a_y2	8a_y3	Farm_Worries	8b_d1	8b_d2	8b_d3	8b_y1	8b_y2	8b_y3	Conflict	9_d1	9_d2	9_y1	9_y2	Conflict_Past
1	1401	R	2015-06-30	Mboole	1	M	1	31.0601	1.41321	Yes	1		38	Married	2	G7	7	14	12	15	0	Headman	4	1	0	0	0	0	8	well being of the family; food, school fees for children, and farming implements.	2	3	4	2	3	4	fertilizers and farming implements, being able to borrow friends farming implements; rainfall pattern	1	2	6	1	2	6	misunderstandings between people, could be family or neighbors	5	0	5	0	yes
2	1404	R	2015-06-30	Mboole	1	F	0	31.4049	1.43908	No	0		42	Married	2	G9	9	21	21	50	4	Inherited	2	0	1	0	0	0	32	Money, Food, Beddings, sickness (for sickness she worries about STIs since she married in a polygomous household)	4	7	8	4	7	8	How to source fertilizers and other farming land issues. Family is growing and land is becoming small. Rainfall is a major worry too. Labor intensity > less animals therefore people have to do a lot of field work. Stagnant water gives them worries about breeding of mosquitoes.	1	4	6	1	7	6	Not agreeing on one thing.	5	0	5	0	Yes
3	1303	R	2015-06-30	Mboole	1	F	0	28.509	0.042682	No	0		73	Widow	4	0	0	50	50	20	1	Inherited	2	0	1	0	0	0	3	Food > she would love to eat nice food especially in the cold season	7	0	0	7	0	0	fertilizer, farming implements, and labor inputs; she's old but has to work in the field to get money, food, and clothing	1	2	3	1	2	3	fighting > verbally and physically with each other	1	2	1	2	Yes
4	1402	A	2015-06-30	Mboole	1	F	0	31.7618	2.58935	No	0		61	Widow	4	G7	7	16	15	15	10	Headman	4	1	0	0	0	0	5	Food shortages as a result of droughts; challenges to take care of family; water problems as borehole is very far	1	4	7	1	4	7	fertilizer packs (subsidies) are not enough; agriculture co op was dissolved so farming is growing tough; rainfall not enoughe especially last season	1	8	6	1	8	6	different ideas hat leads to arguments and misunderstandings	5	0	5	0	yes
5	1301	A	2015-06-30	Mboole	1	M	1	26.4475	0.187839	No	0		52	Married	2	G7	7	30	12	40	20	Inherited	2	0	1	0	0	0	16	livestock diseases; water access especially when poor rainfall; farm inputs expensive; must sell vegetables	5	1	11	1	2	5	capital for fertilizers and seeds; veterinary access personnel are far; market access is limited especially with Food Reserve Agents	1	5	11	1	5	11	misunderstanding; not working together	5	0	5	0	yes
6	1403	G	2015-06-30	Mboole	1	F	0	30.9686	0.960732	No	0		73	Married	2	G1	1	55	55	60	15	Inherited	2	0	1	0	0	0	10	worries about what to feed the children and also water because of long distances	1	7	0	1	7	0	worries about where to find money to buy fertilizer and seeds	1	0	0	1	0	0	misunderstanding of what a person is trying to talk about and also conflict is defined as fighting between people	1	2	1	5	yes
7	1302	G	2015-06-30	Mboole	1	M	1	27.9085	0.1199	No	0		50	Married	2	G7	7	26	26	4	10	Inherited	2	0	1	0	0	0	10	where to find money to pay for school going children; how to improve livelihood	3	4	0	3	4	0	where to get fertilizer and seeds for this coming season; where to find money to buy insecticides for spraying in the garden	1	2	0	1	2	0	not understanding each other usually between the family members (husband and wife)	7	0	7	0	no
8	1304	G	2015-06-30	Mboole	1	F	0	28.8428	0.203532	No	0		32	Married	2	G7	7	9	9	4	10	Inherited	2	0	1	0	0	0	10	hunger; worries about raising money for school going children	3	7	0	3	7	0	where to find money to buy fertilizer and insecticides for spraying in the garden	1	2	0	1	2	0	insulting each other	0	0	1	0	yes
9	1504	D	2015-07-01	Mboole	1	M	1	32.3934	1.93009	Headman	1	14:10:00	66	Married	2	F2	8	12	12	30	8	Inherited	2	0	1	0	0	0	11	system of farming dependance on animal draft power, labor input scarcity; farming inputs due to high cost; school fees; minimal returns to farming	2	3	0	2	3	5	cost of farming inputs; animal labor availability is scarce	1	4	0	1	4	0	different paths or conflicting ideas causing opposition between people; confusion	5	0	5	0	yes
10	1103	R	2015-07-01	Mboole	1	M	1	32.8874	0.0543974	No	0	10:30:00	26	Single	1	College Grad	17	10	10	50	50	Inherited	2	0	1	0	0	0	20	water source; animal diseases; school challenges; access to health care because of distance	1	3	5	1	3	5	not enough access to capital to buy farming inputs; rainfall pattern; not having enough water for the crops	1	10	0	1	10	6	misunderstanding between two people	5	0	5	0	yes
11	1104	R	2015-07-01	Mboole	1	M	1	33.9755	0.510319	No	0	11:32:00	77	Married	2	G2	2	52	30	40	8	Inherited	2	0	1	0	0	0	7	lack of money; less produce from farm to have enough to sell for household needs like soap, clothing, etc	4	0	0	4	0	0	fertilizer and farming inputs and implements; rainfall pattern	1	2	6	1	2	6	misunderstanding between people of one family or community	5	0	5	0	yes
12	1502	A	2015-07-01	Mboole	1	M	1	33.2417	2.48878	No	0	13:00:00	51	Married	2	F3	9	30	21	60	24	Inherited	2	0	1	0	0	0	16	farming implements; hospital is far; water for drinking as boreholes are far	1	5	6	1	2	6	rainfall decrease; drought especially this past year; livestock diseases especially cattle diseases and veterinary officer lives far away	6	5	0	6	5	0	fault finding among families and general village level	1	4	1	4	yes
13	1101	A	2015-07-01	Mboole	1	F	0	34.4985	0.049255	No	0	09:45:00	44	Married	2	G9	9	15	15	50	7	Headman	4	1	0	0	0	0	8	living livelihood (clothing and food); progress / development issue (business and gardening); livestock disease; family sickness and death	4	5	7	4	5	6	capital in farming (fixed assets such as gardening wire); water for gardening; high cost of fertilizer and seeds; lime cattle disease and also cow dung shortages	2	10	1	2	10	1	misunderstanding between spouses over money and school fees. Corruption in Headman court hearings. And boundary disputes	7	5	7	8	yes
14	1102	G	2015-07-01	Mboole	1	M	1	35.2477	2.25337	No	0	10:10:00	72	Married	2	S6	7	24	24	30	34	Inherited	2	0	1	0	0	0	4	agriculture; where to find wire to fence the fish ponds; cattle dying from diseases; high blood pressure	2	5	8	1	2	5	where to find money to buy fertilizers and chemicals for cattle	1	5	0	1	5	0	misunderstanding between neighbors	5	0	5	0	no
15	1501	G	2015-07-01	Mboole	1	M	1	33.3599	2.03898	No	0	12:45:00	77	Married	2	S6	7	34	34	300	14	Inherited	2	0	1	0	0	0	15	nothing to eat because of high spell drought that was experienced last season. The government does not help the poor people (farmers).	4	9	0	7	13	0	Where to find money to buy fertilizer because the government does not give farmer's fertilizer on time	1	9	0	1	9	0	provoking each other verbally	1	0	1	0	yes
16	1503	G	2015-07-01	Mboole	1	M	1	34.0041	1.90889	No	0	13:50:00	78	Married	2	S6	7	44	44	20	2	Inherited	2	0	1	0	0	0	10	where to find money to pay for school going children; what to eat as a family because there was no bumper harvest; health problems	3	7	8	3	7	8	where to find money for fertilizer and farming implements	1	2	0	1	2	0	misunderstanding each other among family members	5	0	5	0	no
17	1201	R	2015-07-02	Mboole	1	M	1	31.6718	3.87746	No	0	10:32:00	49	Married	2	G7	7	26	26	15	10	Inherited	2	0	1	0	0	0	10	Schools fees; feeding the family	3	7	0	3	7	0	farming inputs and implements as most are borrowed; money to buy his own implements and inputs.	1	2	0	1	2	0	No understanding each other	5	0	5	0	Yes
18	1204	R	2015-07-02	Mboole	1	M	1	31.7558	3.64254	No	0	11:45:00	32	Married	2	G8	8	15	3	20	7	Inherited	2	0	1	0	0	0	5	Source of farming inputs; animal vaccine access; children school fees; sources of food.	2	3	5	2	3	5	Rainfall > Not enough; farming input costs and implements.	6	1	2	6	1	2	Not working together with those you live with.	5	0	5	0	Yes
19	1202	A	2015-07-02	Mboole	1	M	1	31.8695	5.89705	No	0	11:10:00	36	Married	2	G6	6	17	5	40	7	Headman	4	1	0	0	0	0	7	Land depleted and it's hard to be a farmer; business opportunities and capital are not accessible.	2	4	10	2	4	10	Farming input costs too high.	1	0	0	1	0	0	Misunderstandings between families and community.	5	0	5	0	Yes
20	1203	G	2015-07-02	Mboole	1	M	1	32.5884	5.40212	No	0	11:12:00	45	Married	2	G7	7	8	8	30	7	Inherited	2	0	1	0	0	0	15	how to find money for school going childre,; what to feed the family	3	7	0	3	7	0	where to find money for buying fertilizer for this coming season	1	0	0	1	0	0	misunderstandings between neighbors	5	0	5	0	yes
21	1601	R	2015-07-02	Mboole	1	F	0	33.6063	4.52994	No	0	13:20:00	59	Married	2	G8	8	43	20	20	15	Inherited	2	0	1	0	0	0	7	fertilizer; distance to find clean water; food shortage; school fees for the children; money for general household needs; one of the children needs to get NRC after legal age	1	2	7	1	2	7	farming inputs; farming implements; rainfally not being enough	1	2	6	1	2	6	fighting in a family or community	5	0	1	4	yes
22	1602	G	2015-07-02	Mboole	1	M	1	34.1074	4.18187	No	0	13:38:00	24	Married	2	G10	10	10	10	40	0	Headman	4	1	0	0	0	0	5	hunger; diseases; schools fees; what to eat	3	7	8	3	7	8	where to find money to buy cattle and fetilizers	1	4	0	1	4	0	misunderstandings of people in the community	5	0	5	0	yes
23	1603	A	2015-07-02	Mboole	1	F	0	34.1465	4.08044	No	0	13:43:00	52	Married	2	G5	5	36	7	2	0	Headman	4	1	0	0	0	0	6	how to get out of poverty; general livelihood; farm implements and inputs are expensive	2	4	0	2	4	0	high cost of input, no implements	1	2	0	1	2	0	misunderstanding with others; lack of people ask from for help / lack of sharing resources; lack of food (poverty)	5	6	5	6	yes
24	1604	G	2015-07-02	Mboole	1	M	1	34.4528	4.0175	No	0	14:17:00	51	Married	2	G4	4	27	27	35	8	Inherited	2	0	1	0	0	0	9	school fees; health problems; how to improve livelihood; animals dying from unknown diseases	3	8	4	3	8	4	where to find money to buy fertilizers and seeds and farming implements	1	2	0	1	2	0	fighting between neighbors	1	0	1	0	yes
25	1801	R	2015-07-03	Mboole	1	M	1	32.2045	9.31648	No	0	10:09:00	41	Married	2	G12	12	18	15	40	7	Inherited	2	0	1	0	0	0	8	money; labor shortage; clothing; no proper housing	2	4	0	2	4	0	fertilizer and other farming inputs; lack of vaccines for animals; lack of proper markets; farming implements; sourcing money for for co op paying inputs	1	5	11	1	5	2	not understanding each other	5	0	5	0	yes
26	1701	R	2015-07-03	Mboole	1	M	1	30.2856	5.839	No	0	13:30:00	40	Married	2	G9	9	19	19	30	2	Inherited	2	0	1	0	0	0	8	food issues; sending children to school; farming inputs and implements; health issues	2	3	7	2	3	7	rainfall; farming inputs and implements	1	2	6	6	1	2	misunderstanding between people	5	0	5	0	yes
27	1802	G	2015-07-03	Mboole	1	M	1	32.587	10.433	No	0	10:40:00	49	Married	2	G8	8	26	26	40	0	Inherited	2	0	1	0	0	0	10	where to find money to buy cattle for farming; health problems	4	8	0	2	8	0	where to find money to buy fertilizers, seeds, and farming implements	1	2	0	1	2	0	misunderstanding between people usually among family members and neighbors	5	0	5	0	yes
28	1804	G	2015-07-03	Mboole	1	M	1	32.3442	9.96558	No	0	11:20:00	21	Single	1	G7	7	2	2	5	0	Inherited	2	0	1	0	0	0	1	health problems; agriculture; how to find stable employment	2	4	8	2	8	0	where to find money to buy farming implements and fertilizer and seed	1	2	0	1	2	0	verbal fights between people	1	0	1	0	yes
29	1703	G	2015-07-03	Mboole	1	F	0	28.7355	4.88113	No	0	14:00:00	56	Married	2	G7	7	35	35	40	11	Inherited	2	0	1	0	0	0	10	agriculture; school fees; what to feed the family; how to improve the standard of living	2	3	7	2	3	7	lack of money to buy fertilizers, seends, and other farming implements	1	2	0	1	2	0	quarreling with people each and every time	1	0	1	0	yes
30	1702	A	2015-07-03	Mboole	1	F	0	29.8553	5.66398	No	0	13:47:00	32	Married	2	G8	8	11	11	60	14	Inherited	2	0	1	0	0	0	11	not enough rainfall last season	9	0	0	11	0	0	cooperatives delay to give subsidized inputs; livestock diseases; expensive cost of livestock medicine	5	9	0	5	1	0	misunderstandings	5	0	5	0	yes
31	1803	A	2015-07-03	Mboole	1	M	1	31.5753	10.6673	No	0	11:06:00	31	Married	2	G3	3	7	6	25	0	Inherited	2	0	1	0	0	0	4	farming implements; animals; lack of money for farming inputs; water problems and poor rainfall; lack of cooperatives	1	2	4	1	2	5	farm implements and inputs; inconsistent rainfall pattern	1	2	6	1	2	6	lack of communication relating to working together; being undermined because of lack of cattle and from implements by community leaders	5	6	5	6	yes
32	1704	R	2015-07-03	Mboole	1	M	1	28.2532	4.63086	No	0	14:34:00	34	Married	2	G7	7	3	4	30	0	Inherited	2	0	1	0	0	0	9	fertilizers; food; sending children to school; how to get capital and clothing	2	3	4	2	3	4	fertilizer and other farming inputs and implements; rainfall; land small and used every year so nutrients depleted	1	7	6	1	2	6	misunderstanding between people from not agreeing on things	5	0	5	0	yes
33	2502	G	2015-07-06	Mbabala	2	M	1	38.8005	0.296199	Yes	1	10:30:00	42	Married	2	G10	10	3	3	50	3	Headman	4	1	0	0	0	0	7	schools fees for school going children; clothing and how to feed the family	3	4	7	3	4	7	where tofind money to buy seeds, fertilizers, and chemicals (weed killers)	1	2	0	1	2	0	fighting of people because of poverty and keeping themselves busy	6	0	1	6	yes
34	2504	G	2015-07-06	Mbabala	2	F	0	37.8503	1.22037	no	0	11:42:00	61	Married	2	G7	7	35	35	40	16	Inherited	2	0	1	0	0	0	8	Agriculture; fees for school going children; how to improve the livelihood	2	3	4	2	3	4	where to find money to buy fertilizers, seeds, and farming implements to expand the size of production	1	2	8	1	2	0	misunderstandings between people	5	0	5	0	yes
35	2602	G	2015-07-06	Mbabala	2	F	0	38.0871	5.50041	No	0	13:30:00	58	Married	2	F3	9	17	17	20	2	Inherited	2	0	1	0	0	0	7	health problems; school fees for children; clothing; and how to improve the livelihood	3	4	8	3	4	8	where to find money to buy fertilizers, seeds, and farming implements	1	2	0	1	2	0	fighting or neighbors and family members for a certain reason	1	0	1	0	yes
36	2604	G	2015-07-06	Mbabala	2	M	1	38.2654	5.44635	No	0	14:40:00	44	Married	2	G7	7	5	5	20	10	Headman	4	1	0	0	0	0	8	agriculture; health problems; school fees; what to feed the family	2	8	3	2	8	3	where to find money to buy fertilizers, seed, and cattle for farming	1	2	4	1	2	4	misunderstanding of family members	5	0	5	0	yes
37	2501	R	2015-07-06	Mbabala	2	F	0	38.5762	0.150439	No	0	09:50:00	31	Single	1	G5	5	0	0	35	3	Headman	4	1	0	0	0	0	10	money sources > how to source it; food shortage; water shortage; fertilizers and farming inputs.	4	7	1	4	7	1	fertilizer and other farming inputs and implements; land issues > no proper place to do gardening	1	2	7	1	2	7	one being in the wrong and does not acknowledge it	5	0	5	0	yes
38	2503	R	2015-07-06	Mbabala	2	M	1	38.8527	0.755468	no	0	11:16:00	55	Married	2	F3	9	30	15	90	40	Headman	4	1	0	0	0	0	12	farming inputs and implements; animal vaccines; and distance to markets for his produce.	2	4	5	2	4	5	farming inputs and implements; animal vaccines; and distance to markets for his produce and lack of transport; high purchasing prices but low selling prices	1	11	5	1	2	5	not understanding	5	0	5	0	yes
39	2601	R	2015-07-06	Mbabala	2	M	1	38.1842	4.66855	No	0	13:15:00	53	Married	2	F3	9	26	26	70	15	Headman	4	1	0	0	0	0	7	school fees for children	3	0	0	3	0	0	farming implements, mainly draught power; not enough land	2	4	7	2	4	7	not getting along or misunderstanding each other	5	0	5	0	yes
40	2603	R	2015-07-06	Mbabala	2	M	1	37.8366	4.72778	No	0	14:15:00	36	Widow	4	G7	7	9	9	30	1	Headman	4	1	0	0	0	0	8	fees for children school	3	0	0	3	0	0	FSP does not own up to their promise of fertilizer	8	1	0	8	1	0	not getting along and misunderstanding each other	5	0	5	0	yes
41	2701	R	2015-07-07	Mbabala	2	M	1	36.1043	6.84861	No	0	09:53:00	70	Married	2	G7	7	50	50	10	5	Headman	4	1	0	0	0	0	5	farming inputs and implements; food; lack of money for school fees; welfare of the family	2	7	3	2	7	3	fariming inputs and implements; fertile lands; no money to join farming groups to source seend and fertilizer	1	2	7	1	2	7	misunderstanding between people	5	0	5	0	yes
42	2703	R	2015-07-07	Mbabala	2	M	1	34.0104	5.17849	No	0	11:14:00	35	Married	2	G6	6	21	4	30	0	Headman	4	1	0	0	0	0	10	poor harvest, food; lack of cattle for farming	2	7	0	5	7	0	rainfall patterns; lack of farming inputs and implements	6	1	2	6	1	2	not understanding each other or agreeing on one thing	5	0	5	0	yes
43	2801	R	2015-07-07	Mbabala	2	F	0	31.7666	6.91583	No	0	13:07:00	45	Widow	4	G9	9	14	14	20	10	Purchased	1	0	0	1	0	0	3	ways of sourcing money for next season's inputs; health wise, money to g for review; money for animal vaccines	2	8	4	2	8	4	lack of personal implements, fertilizers, and other farming inputs	1	2	0	2	1	0	misunderstanding in a family or community	5	0	5	0	yes
44	2803	R	2015-07-07	Mbabala	2	M	1	31.5685	4.38286	Headman	1	14:10:00	57	Married	2	G12	12	25	25	20	8	Headman	4	1	0	0	0	0	16	poor harvest; school fees; farming inputs and implements; water sources because no borehole	1	7	3	1	7	3	rainfall pattern and farming inputs and implements	1	2	6	1	2	6	not understanding each other	5	0	5	0	yes
45	2704	G	2015-07-07	Mbabala	2	M	1	33.8483	5.14344	No	0	11:20:00	70	Married	2	F4	10	42	42	30	7	Inherited	2	0	1	0	0	0	6	where to find money to improve the livelihood; health problems; clothing	4	8	0	4	8	0	where to find money to buy fertilizers and seeds	1	0	0	1	0	0	violence and fighting among family members	2	0	1	2	yes
46	2702	G	2015-07-07	Mbabala	2	M	1	35.8008	6.21983	No	0	10:10:00	50	Married	2	G7	7	25	25	30	6	Headman	4	1	0	0	0	0	10	school fees for children; how to improve livelihood and clothings	3	4	0	3	4	0	where to find money to buy fertilizers and seeds	1	0	0	1	0	0	misunderstanding in talking	5	0	5	0	yes
47	2802	G	2015-07-07	Mbabala	2	F	0	31.4464	7.0155	Yes	1	13:15:00	29	Married	2	9	9	10	10	50	6	Purchased	1	0	0	1	0	0	5	fees for children; improve livelihood and clothing	3	4	0	3	4	0	where to find money to buy fertilizers, seeds, and farming implements	1	2	0	1	2	0	not understanding each other between two or more people	5	0	5	0	yes
48	2804	G	2015-07-07	Mbabala	2	F	0	32.1846	2.28089	No	0	14:30:00	42	Married	2	G6	6	21	21	130	8	Inherited	2	0	1	0	0	0	12	water; health needs; how to improve livelihood	1	8	4	1	4	8	where to find money to buy fertilizers and seeds	1	2	0	1	0	0	not understanding each other as individuals or a group as a whole	5	0	5	0	yes
49	2201	R	2015-07-08	Mbabala	2	M	1	27.2167	0.413276	Yes and Headman	1	09:35:00	49	Married	2	G9	9	27	27	120	7	Inherited	2	0	1	0	0	0	10	lack of money for school fees; water worries because no borehole in his village and have to get water from next village; vaccination for livestock; need for more cattle	1	3	5	1	3	5	rainfall patterns; not enough land for farming ; not enough labor; not enough implements to use, co op's do not give them enough fertilizer inputs.	6	7	4	6	7	4	not getting along	5	0	5	0	yes
50	2204	R	2015-07-08	Mbabala	2	M	1	27.1453	0.119883	No	0	10:45:00	42	Married	2	G8	8	18	18	100	20	Inherited	2	0	1	0	0	0	8	food; farming inputs; managing other members children	2	7	0	2	3	7	rainfall not enough; farming inputs and implements	1	2	6	1	2	6	verbal fighting	1	0	1	0	yes
51	2102	R	2015-07-08	Mbabala	2	F	0	27.9945	0.388599	No	0	12:55:00	64	Married	2	G7	7	20	20	20	0	Headman	4	1	0	0	0	0	7	farming implements and inputs	2	0	0	2	0	0	farming implements and inputs; money; late planting due to lack of personal implements	1	2	0	1	2	0	misunderstanding between people	5	0	5	0	no
52	2104	R	2015-07-08	Mbabala	2	M	1	26.9691	0.193623	No	0	13:56:00	44	Married	2	G12	12	10	10	10	0	Inherited	2	0	1	0	0	0	9	capital to start a business; farming inputs and implements	2	4	0	2	4	0	prices of farming inputs are too high; no money for inputs and hiring of implements; water sources	1	2	10	1	2	10	not understanding each other	5	0	5	0	Yes
53	2202	G	2015-07-08	Mbabala	2	F	0	27.7273	0.0315612	No	0	09:45:00	50	Married	2	G7	7	3	3	20	0	Headman	4	1	0	0	0	0	8	school fees for pupils; how to improve the family livelihood and health problems	3	4	8	3	4	8	where to find money to buy fertilizers , seeds, and farming implements / oxen	1	2	4	1	2	4	misunderstanding in communication of people	5	0	5	0	Yes
54	2203	G	2015-07-08	Mbabala	2	F	0	27.4405	0.194802	No	0	10:35:00	55	Married	2	G4	4	31	31	40	17	Inherited	2	0	1	0	0	0	11	how to improve the family livelihood; fees for school children; health programs (malaria)	3	4	8	3	4	8	where to find money to buy fertilizers and seeds	1	0	0	1	0	0	jealousy among people	5	0	5	0	yes
55	2101	G	2015-07-08	Mbabala	2	F	0	27.9006	0.277898	No	0	12:40:00	75	Single	1	G3	3	47	47	10	1	Inherited	2	0	1	0	0	0	6	shelter; food; school fees; how to improve livelihood; health problems (sickle cell anemia)	7	8	4	7	8	4	fertilizers, seeds, and farming implements (oxen and plough)	1	2	4	1	2	4	misunderstandings of people	5	0	5	0	yes
56	2103	G	2015-07-08	Mbabala	2	F	0	28.3569	1.99627	No	0	13:35:00	39	Married	2	G9	9	22	22	220	20	Headman	4	1	0	0	0	0	10	water; school fees; food and how to improve their livelihood	1	3	7	1	3	7	rainfall; seeds; fertilizers	6	1	0	6	1	0	misunderstanding in talking among family members or people	5	0	5	0	yes
57	2401	G	2015-07-09	Mbabala	2	F	0	33.6049	0.492867	Senior Headman Wife	0	09:05:00	37	Married	2	G7	7	15	15	30	3	Inherited	2	0	1	0	0	0	5	food; school fees; agriculture; health problems (malaria and coughing)	2	3	7	2	3	7	where to find money to buy fertilizers and seeds	1	0	0	1	0	0	misunderstanding of people in communication	5	0	5	0	yes
58	2403	G	2015-07-09	Mbabala	2	F	0	31.5927	1.8141	No	0	10:35:00	63	Married	2	G11	11	6	6	25	11	Headman	4	1	0	0	0	0	4	fees for students; food; clothing; shelter; how to improve the family livelihood	3	4	7	3	4	7	Where to find money to buy fertilizers, insecticides, and seeds	1	2	0	1	2	0	fighting of people because they have failed to reach an agreed standard	1	0	1	0	yes
59	2302	G	2015-07-09	Mbabala	2	F	0	31.1728	3.79437	No	0	14:02:00	42	Married	2	7	7	21	21	30	4	Inherited	2	0	1	0	0	0	10	agriculture; food; shelter; clothing; how to improve the family livelihood; and school fees	2	3	4	2	3	4	where to find money to buy fertilizers, seeds and farming implements	1	2	0	1	2	0	misunderstanding in communication	5	0	5	0	yes
60	2304	G	2015-07-09	Mbabala	2	M	1	31.1863	3.5052	No	0	15:00:00	41	Married	2	7	7	18	18	10	1	Headman	4	1	0	0	0	0	11	shelter; food; fees for children school; health problems; how to improve the family livelihood	3	4	7	3	4	7	where to find money to buy fertilizers, seeds, and farming implements	1	2	0	1	2	0	misunderstanding of people when they are communicating	5	0	5	0	yes
61	2402	R	2015-07-09	Mbabala	2	F	0	33.258	0.319809	Yes	1	09:17:00	44	Married	2	G9	9	22	22	130	24	Inherited	2	0	1	0	0	0	11	food' fees for schools; clothing; health issues	3	4	7	3	4	7	farming inputs and implements; rainfall pattern; prices for selling their produce and products	1	6	11	1	2	11	not understanding each other	5	0	5	0	yes
62	2402	R	2015-07-09	Mbabala	2	M	1	32.0326	1.45567	No	0	10:51:00	78	Married	2	Graduate	17	49	19	80	11	Headman	4	1	0	0	0	0	11	faming; vaccines for the animals, water issues, for his newly built house	1	2	5	1	2	5	poor harvest from this year will make it hard to get farming inputs next season; rainfall patterns; poor selling price for produce	1	6	11	1	6	11	not understanding each other	5	0	5	0	yes
63	2301	R	2015-07-09	Mbabala	2	F	0	31.3066	3.87156	No	0	13:55:00	44	Married	2	G6	6	28	12	130	120	Inherited	2	0	1	0	0	0	15	rainfall pattern; welfare of the family especially orphan; food security	4	7	11	4	7	11	farming inputs; poor harvest for 2014 15 farming might affect the year to come since they dependon produce for their capital	1	12	0	1	12	0	quarreling with another person	1	0	1	0	yes
64	2302	R	2015-07-09	Mbabala	2	M	1	31.2846	3.62342	No	0	14:40:00	44	Married	2	G7	7	25	17	130	13	Inherited	2	0	1	0	0	0	8	famring inputs; school fees; feeding family; welfare of the family; clothing; beddings	2	3	7	2	3	7	source of money for farming inputs and implements; vaccines for animals and labour	1	2	5	1	2	5	misunderstanding between two or more people	5	0	5	0	yes
65	3101	G	2015-07-13	Sibanyati	3	M	1	14.1949	0.344264	Yes	1	09:22:00	32	Married	2	G12	12	7	7	20	0	Purchased	1	0	0	1	0	0	5	how to feed the family; where to find money to go to college; how to improve the family livelihood	4	7	0	3	4	7	the land is not fertile; where to find to buy seeds, fertilizers, and farming implements	1	2	7	1	2	7	misunderstanding of people in communication	5	0	5	0	yes
66	3103	G	2015-07-13	Sibanyati	3	M	1	15.5081	1.40677	No	0	10:28:00	49	Married	2	G9	9	5	5	90	5	Inherited	2	0	1	0	0	0	7	where to find money to buy food stuffs for the family; school fees	3	7	0	3	7	0	poor rainfall; where to find money to buy fertilizers and seeds and other farming implements	6	1	2	6	1	2	misunderstanding in communication between two or more people	5	0	5	0	Yes
67	3201	G	2015-07-13	Sibanyati	3	M	1	20.9627	5.05623	No	0	11:52:00	61	Married	2	7	7	30	30	70	12	Purchased	1	0	0	1	0	0	15	Agriculture; fees for school going children; how to improve the livelihood	2	3	7	2	3	4	where to find resources to buy fertilizers and seeds and land preparation	1	7	0	1	7	0	jealousy because of no development in the area	6	0	6	0	Yes
68	3203	G	2015-07-13	Sibanyati	3	M	1	20.7821	6.13038	Yes	1	13:35:00	54	Married	2	5	5	18	18	30	16	Government	5	0	0	0	1	0	5	agriculture; school fees; health problems; clothing; what to feed the family	2	3	8	2	3	8	where to find money to buy fertilizers and seeds	1	0	0	1	0	0	misunderstanding in communication	5	0	5	0	Yes
69	3102	R	2015-07-13	Sibanyati	3	M	1	16.5361	0.197739	No	0	09:43:00	53	Married	2	G12	12	27	27	60	52	Inherited	2	0	1	0	0	0	17	weather pattern and climate change; farm implements; fees for the children; loans are small	2	3	11	2	3	11	loans are small; farming implements; climate change; late payments from FRA; private buyers don't promote farmer's	8	2	6	12	2	6	not getting along	5	0	5	0	Yes
70	3104	R	2015-07-13	Sibanyati	3	M	1	17.4619	1.86141	No	0	11:00:00	63	Married	2	G11	11	15	15	50	11	Purchased	1	0	0	1	0	0	22	selling prices are low compared to high purchasing price for inputs; school fees; water issues; the land is too small for his farming activities; need for hyrdaulic power	1	2	3	1	2	3	small land; low selling price; lack of farming or agriculture loans; poor farming in that they have been used for a very long time	7	8	0	11	12	2	not getting alond	5	0	5	0	no
71	3203	R	2015-07-13	Sibanyati	3	M	1	19.6749	3.45405	No	0	12:47:00	60	Married	2	G7	7	25	25	10	0	Government	5	0	0	0	1	0	6	farming implements and inputs; money for general use; water source is far; transport to nearest clinic or hospital	1	2	4	1	2	4	loans are small; farming implements; money for buying inputs to top what government gives is not easily accessed	1	2	8	12	2	1	misunderstanding between people	5	0	5	0	yes
72	3204	R	2015-07-13	Sibanyati	3	M	1	19.8134	3.57118	No	0	14:38:00	63	Married	2	G9	9	23	23	30	12	Rent	3	0	0	0	0	1	15	school fees; farming rates	2	3	0	2	3	0	farming rates, getting farming packs, implements, and money for inputs	11	1	2	11	1	2	not understanding each other	5	0	5	0	yes
73	3801	G	2015-07-14	Sibanyati	3	F	0	20.2879	5.94021	No	0	09:23:00	48	Married	2	G11	11	20	20	60	15	Government	5	0	0	0	1	0	6	school fees; what to eat; how to improve the family livelihood	3	4	7	3	4	7	rainfall; fertilizers; seeds	1	6	0	1	6	0	quarrelling between the family members	1	0	1	0	yes
74	3803	G	2015-07-14	Sibanyati	3	M	1	21.0015	6.8224	No	0	10:20:00	45	Married	2	G4	4	30	30	30	0	Purchased	1	0	0	1	0	0	13	school fees; clothing; food; health problems; how to improve family livelihood	3	4	7	3	4	7	fertilizers, seeds, and farming implements	1	2	0	1	2	0	misunderstanding of people in communication	5	0	5	0	yes
75	3401	G	2015-07-14	Sibanyati	3	F	0	23.4426	7.51632	No	0	11:50:00	39	Married	2	G8	8	10	10	240	38	Purchased	1	0	0	1	0	0	18	health problems (mentally disturbed); school fees	3	8	0	3	8	0	rainfall; fertilizers; seeds	6	1	0	6	1	0	misunderstanding of people in communication	5	0	5	0	yes
76	3403	G	2015-07-14	Sibanyati	3	F	0	27.8225	4.9773	Yes	1	13:11:00	26	Married	2	G9	9	3	3	35	4	Inherited	2	0	1	0	0	0	4	food; fees for school; health problems; water	1	3	7	1	3	7	rainfall; fertilizers; seeds	6	1	0	6	1	0	misunderstanding of people	5	0	5	0	yes
77	3802	R	2015-07-14	Sibanyati	3	M	1	21.8742	7.03686	Yes	1	09:43:00	42	Married	2	Graduate	17	6	6	70	7	Rent	3	0	0	0	0	1	6	school fees; rainfall pattern (climate change); health issues; safety reasons	3	8	11	3	4	8	poor soils; choice of early maturing seed; climate changes; farming inputs; transport to the market and also low selling compared to purchase; lack of market for other farm products	7	1	6	7	1	6	exchange of bad words or not getting along	1	5	1	5	yes
78	3804	R	2015-07-14	Sibanyati	3	F	0	21.8784	5.98039	No	0	10:38:00	30	Single	1	G7	7	3	3	10	0	Inherited	2	0	1	0	0	0	4	livelihood issues: food, clothing, bedding; where to get money or capital to buy farming inputs and implements	2	4	7	2	4	7	farming inputs and implements	1	2	0	1	2	0	not getting along with people around	5	0	5	0	yes
79	3402	R	2015-07-14	Sibanyati	3	M	1	23.8435	7.87821	No	0	12:01:00	86	Married	2	F2	8	39	39	40	24	Purchased	1	0	0	1	0	0	8	welfare of the family; farming input and implements; lack of loans; government subsidies they are getting are too small; no health care center in the area	2	4	6	2	4	6	lack of loans in the area; late delivery of inputs from farming packs; lack of water	8	9	10	12	9	10	misunderstanding between people	5	0	5	0	yes
80	3404	R	2015-07-14	Sibanyati	3	F	0	27.8558	5.08577	No	0	13:17:00	28	Married	2	G9	9	8	8	30	4	Inherited	2	0	1	0	0	0	6	school fees; farming inputs and implements	2	3	0	3	2	0	poor rainfall patterns; farming inputs and implements	1	2	6	1	2	6	differing in thinking or misunderstanding between people	5	0	5	0	yes
81	3601	G	2015-07-15	Sibanyati	3	M	1	21.057	6.35089	No	0	09:31:00	37	Married	2	G12	12	16	16	80	12	Purchased	1	0	0	1	0	0	15	managing the family; school fees' health problems	3	4	8	3	4	8	rainfall; fertilizers; seeds	6	1	0	6	1	0	misunderstanding among family members	5	0	5	0	yes
82	3701	G	2015-07-15	Sibanyati	3	M	1	22.0238	7.87186	Yes	1	10:45:00	76	Married	2	G9	9	30	30	120	24	Purchased	1	0	0	1	0	0	3	how to improve the next farming season	2	0	0	2	0	0	fertilizer, seed, rainfall	1	6	0	1	6	0	jealousy because of development by persons	6	0	6	0	yes
83	3703	G	2015-07-15	Sibanyati	3	M	1	22.2845	7.69954	No	0	11:35:00	65	Married	2	F2	8	34	34	60	23	Purchased	1	0	0	1	0	0	10	what is needed at the farm; food; improving the farm	2	7	0	2	7	0	farming inputs; rainfall	1	6	0	1	6	0	misunderstanding of people's opinions	5	0	5	0	yes
84	3603	G	2015-07-15	Sibanyati	3	M	1	20.544	4.60528	Yes	1	13:30:00	43	Married	2	G9	9	7	7	50	7	Purchased	1	0	0	1	0	0	4	managing the family; fees for school; health issues	3	4	8	2	3	8	rainfall; fertilizers; seeds	1	6	0	1	6	0	misunderstanding of people	5	0	5	0	yes
85	3602	R	2015-07-15	Sibanyati	3	M	1	21.6129	6.49558	No	0	09:35:00	45	Married	2	G9	9	10	10	100	9	Purchased	1	0	0	1	0	0	7	health issues; government has brought hardship to people such as distance to schools and safety	3	8	0	3	4	8	rainfall pattern; farming implements; loans are given to farmer's too late	1	6	9	2	6	12	differing in thinking	5	0	5	0	yes
86	3702	R	2015-07-15	Sibanyati	3	M	1	22.3877	9.6001	No	0	10:58:00	42	Married	2	G7	7	20	20	40	0	Inherited	2	0	1	0	0	0	9	health issues; farming inputs and implements; poor soils; water availability for the gardens; school fees	1	2	3	1	2	3	poor soils; farmin inputs and implements; poor rainfall pattern; livestock diseases; market for other grown products is a problem	7	1	6	7	2	6	having different opinions or not understanding each other	5	0	5	0	yes
87	3704	R	2015-07-15	Sibanyati	3	F	0	22.0974	8.09036	No	0	12:14:00	40	Widow	4	G9	9	10	3	20	26	Inherited	2	0	1	0	0	0	9	food; school fees; livelihood of the children; water issues	1	3	4	1	3	4	money for farming inputs; labor intensity	1	4	0	1	4	0	not getting along or misunderstandings	5	0	5	0	yes
88	3604	R	2015-07-15	Sibanyati	3	M	1	20.5466	4.68542	No	0	13:42:00	55	Married	2	F3	9	20	20	60	11	Inherited	2	0	1	0	0	0	14	farming; fees for the children; food security due to food scarcity	2	3	7	2	3	7	farming inputs late arrival	9	0	0	9	0	0	not sharing the same idea	5	0	5	0	yes
89	3501	G	2015-07-16	Sibanyati	3	F	0	20.1615	3.86276	Yes	1	09:21:00	50	Widow	4	G9	9	25	25	30	2	Purchased	1	0	0	1	0	0	15	How to improve the family livelihood	4	0	0	4	0	0	farming inputs and rainfall	6	9	0	1	2	6	misunderstanding	5	0	5	0	yes
90	3504	G	2015-07-16	Sibanyati	3	M	1	19.8856	3.55278	No	0	10:35:00	37	Married	2	G9	9	12	9	130	3	Purchased	1	0	0	1	0	0	5	school fees; health issues; how to improve family livelihood	3	4	8	3	4	8	fertilizer, seed, rainfall	1	6	0	1	6	0	misunderstanding of people in communication	5	0	5	0	yes
91	3301	G	2015-07-16	Sibanyati	3	M	1	19.073	3.51452	No	0	11:51:00	40	Married	2	G9	9	16	16	60	5	Purchased	1	0	0	1	0	0	9	managing the family and fees for school children	3	4	0	3	4	0	fertilizer, seeds, and rainfall	1	6	0	1	6	0	misunderstanding in thoughts through communication	5	0	5	0	yes
92	3303	G	2015-07-16	Sibanyati	3	M	1	19.2283	2.99347	No	0	13:10:00	81	Married	2	Cert*	15	25	25	40	0	Purchased	1	0	0	1	0	0	5	global warming; health facility access; school facilities not enough; how to improve the family livelihood	3	4	6	3	4	6	where to get money to buy fertilizers, seeds, and other farming inputs	1	0	0	1	0	0	misunderstanding of people in communication and disagreement of people which sometimes leads to physical fights	5	2	5	2	yes
93	3502	R	2015-07-16	Sibanyati	3	M	1	25.2854	9.60302	No	0	09:40:00	39	Married	2	G9	9	4	4	40	12	Inherited	2	0	1	0	0	0	5	fertilizers; need for enough animals / livestocks	1	5	0	2	5	0	fertilizers and other farming inputs and implements; worry about loans	1	2	8	1	2	8	misunderstanding between people	5	0	5	0	yes
94	3503	R	2015-07-16	Sibanyati	3	F	0	23.0423	7.5473	No	0	10:25:00	50	Widow	4	Graduate	17	19	19	110	15	Inherited	2	0	1	0	0	0	21	posession of farm, child might claim their farm's land; farming in puts are expensive; no proper loans	2	4	10	2	4	10	no proper loans; farming inputs are expensive; small land, family is growing; low selling price compared to purchase price; late payment from FRA	1	7	8	1	7	12	differences among or between people	5	0	5	0	yes
95	3302	R	2015-07-16	Sibanyati	3	F	0	18.8763	3.88081	No	0	12:05:00	58	Married	2	F3	9	10	10	50	16	Purchased	1	0	0	1	0	0	3	poor soils with lots of stone and sandy soils	10	0	0	2	0	0	poor soils which are not suitable for farming	7	0	0	7	0	0	not understanding eachother, misunderstandings	5	0	5	0	no
96	3304	R	2015-07-16	Sibanyati	3	M	1	19.4834	3.15585	No	0	13:20:00	55	Married	2	G9	9	30	25	40	18	Government	5	0	0	0	1	0	16	school fees; not enough loans	3	4	0	3	4	0	not enough loans to sustain farming needs; late delivery of inputs; rumors are that government is pulling out this farmer input support program	9	8	0	9	12	0	not getting along or misunderstanding	5	0	5	0	no
97	4604	G	2015-07-20	Singani	4	M	1	32.2927	15.0445	Yes	1	12:30:00	41	Married	2	G7	7	15	15	30	3	Inherited	2	0	1	0	0	0	9	agriculture; health problems; where to find money to buy food stuffs and improve the family livelihood	2	4	8	2	4	8	where to find to buy fertilizers and seeds	1	0	0	1	0	0	misunderstanding of people in the community	5	0	5	0	yes
98	4501	G	2015-07-20	Singani	4	F	0	26.5293	9.33564	No	0	14:00:00	23	Married	2	G12	12	2	2	40	0	Government	5	0	0	0	1	0	6	health problems; improving the professional as a teacher ie furthering education	3	8	0	3	8	0	little rainfall ie change in rainfall pattern	6	0	0	6	0	0	misunderstanding in communication between people	5	0	5	0	no
99	4503	G	2015-07-20	Singani	4	M	1	23.511	5.33547	No	0	14:35:00	67	Married	2	2	2	15	15	160	4	Inherited	2	0	1	0	0	0	10	water; health problems; how to improve family livelihood	1	4	8	1	4	8	where to find money to buy fertilizers and seeds	1	0	0	1	0	0	jealousy among people	5	0	5	0	yes
100	4601	G	2015-07-20	Singani	4	M	1	28.8753	10.0465	Headman	1	10:52:00	83	Married	2	0	0	62	62	20	4	Inherited	2	0	1	0	0	0	8	where to find money to improve the family livelihood	4	0	0	4	0	0	expensive fertilizers and seeds; rainfall for this coming season as maybe it will be little like last season	1	6	0	1	6	0	quarreling over family matters	1	0	1	0	yes
101	4602	R	2015-07-20	Singani	4	F	0	28.7855	9.96418	No	0	10:58:00	55	Divorced	3	0	0	10	10	10	0	Inherited	2	0	1	0	0	0	8	health issues; less food to feed family; no money to send children to school; no implements or livestock for income	8	7	3	8	7	3	no implements or inputs; she has to pay for implements due to lack of them ie rent	1	2	0	1	2	0	not being on good terms with people	5	0	5	0	Yes
102	4603	R	2015-07-20	Singani	4	M	1	32.8526	15.8445	No	0	12:08:00	26	Married	2	G6	6	5	5	10	0	Headman	4	1	0	0	0	0	7	lack of farming inputs and implements	2	0	0	2	0	0	lack of farming inputs and implements	1	2	0	1	2	0	verbal and physical fighting	1	2	1	2	Yes
103	4502	R	2015-07-20	Singani	4	F	0	25.4284	9.31758	No	0	14:08:00	25	Married	2	G3	3	9	9	15	0	Inherited	2	0	1	0	0	0	7	source of money to buy livestock; household needs; food security	4	5	7	4	5	7	lack of farming inputs and implements	1	2	0	1	2	0	not getting along with another	5	0	5	0	Yes
104	4504	R	2015-07-20	Singani	4	F	0	22.9941	5.0774	No	0	14:55:00	18	Married	2	G9	9	2	2	10	0	Inherited	2	0	1	0	0	0	3	lack of cattle; farming inputs; not enough land for farming; rainfall pattern that is changing	2	5	10	2	5	10	lack of farming inputs and implements; not enough land for farming; rainfall pattern that is changing	1	2	6	1	2	7	fighting	1	2	1	2	no
105	4701	G	2015-07-21	Singani	4	M	1	18.6602	4.60378	Yes	1	09:33:00	35	Married	2	G9	9	7	7	30	0	Inherited	2	0	1	0	0	0	12	where to find money for paying for school going children; how to improve the family livelihood	3	4	0	3	4	0	expensive fertilizers, seeds, and other farming inputs	1	0	0	1	0	0	misunderstanding among family members because of poverty	5	6	5	6	yes
106	4703	G	2015-07-21	Singani	4	F	0	17.9333	3.96467	No	0	10:10:00	49	Married	2	G4	4	31	31	30	0	Inherited	2	0	1	0	0	0	16	how to improve the family livelihood	4	0	0	4	0	0	expensive fertilizers, seeds and farming implements	1	2	0	1	2	0	misunderstanding of people in communication	5	0	5	0	yes
107	4801	G	2015-07-21	Singani	4	F	0	19.2468	6.31773	No	0	11:35:00	33	Married	2	G4	4	9	8	30	9	Inherited	2	0	1	0	0	0	5	Where to find money to buy food stuffs and paying for school fees	3	4	7	3	4	7	how to increase the base area for farming	7	0	0	7	0	0	misunderstanding in communication among family members	5	0	5	0	yes
108	4803	G	2015-07-21	Singani	4	M	1	19.1848	7.32392	Headman	1	12:15:00	52	Married	2	G4	4	33	33	150	6	Inherited	2	0	1	0	0	0	15	where to find money to pay for school children; health problems; lack of proper shelter	3	4	8	3	4	8	expensive fertilizers and seeds; also change in rainfall pattern	1	6	0	1	6	0	jealousy among people in the community	6	0	5	0	yes
109	4804	R	2015-07-21	Singani	4	M	1	18.3705	7.2463	Yes	1	12:30:00	43	Married	2	G8	8	26	12	160	16	Inherited	2	0	1	0	0	0	8	not enough money for school fees; not enough water; health post is far	1	3	6	1	3	6	not enough water; fertilizers; lack of animal vaccination	1	5	10	1	5	10	not getting along	5	0	5	0	yes
110	4802	R	2015-07-21	Singani	4	F	0	19.3029	6.8425	No	0	11:46:00	42	Married	2	G4	4	12	12	20	0	Inherited	2	0	1	0	0	0	11	farming inputs and implements; fees for the children for school; health issues for her and her daughter	2	3	8	2	3	8	farming inputs and implements	1	2	0	1	2	0	not living in peace at your home or community	3	0	3	0	yes
111	4704	R	2015-07-21	Singani	4	M	1	18.677	3.91911	No	0	10:47:00	35	Married	2	G9	9	10	1	10	26	Inherited	2	0	1	0	0	0	8	lack of capital; farming inputs; fees for the children	2	3	4	2	3	4	farming inputs; poor rainfall pattern	1	6	0	1	6	0	arguments between and among people	5	0	5	0	yes
112	4702	R	2015-07-21	Singani	4	F	0	18.1718	4.19799	No	0	09:47:00	40	Married	2	G6	6	6	3	15	2	Inherited	2	0	1	0	0	0	6	changing rainfall pattern	11	0	0	11	0	0	chainging rainfall pattern; farming inputs and implements	1	2	6	1	2	6	not living in peace	3	0	3	0	yes
113	4301	G	2015-07-22	Singani	4	M	1	24.3364	7.47349	No	0	09:40:00	51	Married	2	G7	7	28	28	50	8	Inherited	2	0	1	0	0	0	9	health problems; hunger; where to find money for school going children	3	7	8	3	7	8	expensive fertilizers and seeds; little rainfall or reduction in rainfall pattern	1	6	0	1	6	0	misunderstanding of people in communication	5	0	5	0	yes
114	4303	G	2015-07-22	Singani	4	M	1	24.4796	6.44443	No	0	10:25:00	44	Married	2	G7	7	21	21	230	25	Inherited	2	0	1	0	0	0	8	how to improve the family livelihood	4	0	0	4	0	0	expensive fertilizers, seeds, and rainfall reduction	1	6	0	1	6	0	misunderstanding of people among family members in communication	5	0	5	0	yes
115	4501	G	2015-07-22	Singani	4	F	0	25.531	9.11585	Headman	1	11:45:00	49	Married	2	G7	7	30	30	10	2	Inherited	2	0	1	0	0	0	5	hunger; lack of proper shelter; school fees	3	4	7	3	4	7	expensive fertilizers and seeds	1	0	0	1	0	0	not working together	5	0	5	0	yes
116	4503	G	2015-07-22	Singani	4	F	0	23.3273	4.9511	No	0	12:23:00	28	Married	2	G5	5	8	2	10	0	Inherited	2	0	1	0	0	0	14	health problems; hunger; lack of proper shelter	4	7	8	4	7	8	where to find the farming implements to increase the base	2	8	0	2	8	0	fighting of people either in a family or community	1	0	1	0	Yes
117	4302	R	2015-07-22	Singani	4	F	0	24.5793	7.04266	No	0	09:54:00	34	Married	2	G7	7	5	5	35	0	Inherited	2	0	1	0	0	0	7	sneding children to school; welfare of the family	3	4	0	3	4	0	farming inputs and implements	1	2	0	1	2	0	not understanding each other	5	0	5	0	Yes
118	4304	R	2015-07-22	Singani	4	M	1	25.8113	6.72723	No	0	10:44:00	48	Married	2	G7	7	27	27	20	0	Inherited	2	0	1	0	0	0	15	Sending children to school; feeding the family; beddings and clothing for family	3	4	7	3	4	7	farming inputs and implements are expensive	1	2	0	1	2	0	people not getting along over something that they do not agree	5	0	5	0	Yes
119	4502	R	2015-07-22	Singani	4	F	0	25.2522	8.93791	No	0	11:57:00	65	Divorced	3	0	0	45	45	20	0	Inherited	2	0	1	0	0	0	8	health issues as she is sick; feeding the family is tricky; lack of animals	5	7	8	5	7	8	lack of farming implements and cost of inputs	1	2	0	1	2	0	fighting verbally	1	0	1	0	Yes
120	4504	R	2015-07-22	Singani	4	M	1	22.4368	5.04755	No	0	12:35:00	35	Married	2	G5	5	15	15	100	0	Headman	4	1	0	0	0	0	9	poor rainfall pattern; vaccines for livestock is not readily found; school fees	3	5	11	3	5	11	poor rainfall pattern; farming inputs and implements	6	1	2	6	1	2	not sharing the same idea	5	0	5	0	yes
121	4201	G	2015-07-23	Singani	4	M	1	20.7171	1.92441	No	0	09:05:00	45	Married	2	G7	7	29	29	360	20	Inherited	2	0	1	0	0	0	20	health problems; hunger; water scarcity; fees for school children	8	7	1	8	7	1	expensive fertilizers and seeds	1	0	0	1	0	0	misunderstanding in communication	5	0	5	0	yes
122	4203	G	2015-07-23	Singani	4	F	0	23.0229	2.79609	No	0	09:50:00	43	Married	2	G7	7	14	14	20	10	Headman	4	1	0	0	0	0	5	hunger; shelter; water scarcity; how to improve the family livelihood	1	4	7	1	4	7	expensive fertilizers and farming implements	1	2	0	1	2	0	misunderstanding in communication	5	0	5	0	yes
123	4204	G	2015-07-23	Singani	4	M	1	21.8238	6.62676	Headman	1	11:15:00	48	Married	2	G9	9	23	23	40	0	Inherited	2	0	1	0	0	0	17	water scarcity; lack of proper shelter; health problems	1	4	8	1	4	8	no farming implements; expensive fertilizers and seeds	1	2	0	1	2	0	fighting among family members or people in the community	1	0	1	0	yes
124	4104	G	2015-07-23	Singani	4	M	1	19.1981	7.0137	No	0	12:26:00	72	Married	2	F2	8	36	36	30	4	Headman	4	1	0	0	0	0	8	hunger; water scarcity; health problems especially TB and BP and lack of health institutions	7	1	8	7	1	8	the reduction in rainfall pattern	6	0	0	6	0	0	misunderstanding of people in communication	5	0	5	0	yes
125	4202	R	2015-07-23	Singani	4	M	1	22.0487	2.6483	No	0	09:13:00	51	Married	2	G7	7	28	4	80	46	Inherited	2	0	1	0	0	0	21	food securities; lack of clean water; health issues; feeding the children	1	7	8	1	7	8	animal vaccines are not cheap and not readily available; farming inputs and implements	5	1	2	5	1	2	lack of peace	3	0	3	0	yes
126	4101	R	2015-07-23	Singani	4	F	0	21.7789	5.65847	No	0	10:52:00	32	Married	2	G6	6	13	3	70	3	Rent	3	0	0	0	0	1	10	poor harvest this season; reduced labor in terms of animals; lack of money to buy inputs; paying school fees; clothing and beddings	2	3	4	2	3	4	small personal land, rents farming inputs and implements are not easily accessed, few animals	7	1	2	7	1	2	not getting along	5	0	5	0	yes
127	4102	R	2015-07-23	Singani	4	F	0	21.157	5.90172	No	0	11:45:00	53	Married	2	G7	7	33	12	40	30	Headman	4	1	0	0	0	0	11	farming inputs and implements are tricky to come by; money for school fees	2	3	0	2	3	0	farming inputs and implements are hard to come by	1	2	0	1	2	0	not sharing same ideas	5	0	5	0	no
128	4103	R	2015-07-23	Singani	4	M	1	20.6614	5.4177	No	0	12:20:00	48	Married	2	G10	10	10	8	80	4	Headman	4	1	0	0	0	0	16	no water source nearby; farming implements are not enough; cost and source of building materials	1	2	0	1	2	4	less farming implements; cost of farming inputs is high	1	2	0	1	2	0	he just knows the term but cannot define it	5	0	5	0	yes
129	5802	R	2015-07-27	Batoka	5	M	1	38.6486	8.37641	No	0	10:20:00	51	Married	2	G7	7	28	5	5	2	Inherited	2	0	1	0	0	0	8	health issues; water source; lack of farming inputs and implements; no source of money; lack of tools for his carpentry work	8	1	2	8	1	2	lack of farming inputs and implements; no source of money for buying farming inputs	1	2	0	1	2	0	misunderstandings between people	5	0	5	0	yes
130	5804	R	2015-07-27	Batoka	5	M	1	38.1244	8.02061	No	0	11:40:00	42	Widow	4	G5	5	20	20	10	0	Inherited	2	0	1	0	0	0	4	health issues; where to get money for general use; not enough labor	2	4	8	2	4	8	where to get fertilizers is tricky; no personal implements	1	2	0	1	2	0	not sharing the same idea	5	0	5	0	yes
131	5702	R	2015-07-27	Batoka	5	M	1	34.8564	5.18514	No	0	13:10:00	35	Married	2	G8	8	16	12	30	2	Inherited	2	0	1	0	0	0	8	money for farming inputs and implements; source income for household needs; market for selling produce	2	4	0	2	4	0	money to buy fertilizers, inputs, and implements; market for his produce	1	2	11	1	2	11	not understanding or getting along	5	0	5	0	yes
132	5703	R	2015-07-27	Batoka	5	M	1	34.9549	4.38988	No	0	14:00:00	49	Married	2	G7	7	31	10	50	18	Headman	4	1	0	0	0	0	16	source of farming inputs and implements; source of money for general household needs	2	4	0	2	4	0	source of money for farming inputs and implements	1	2	0	1	2	0	not sharing same ideas	5	0	5	0	yes
133	5801	G	2015-07-27	Batoka	5	M	1	38.8215	7.00143	Yes	1	10:21:00	50	Married	2	F2	8	28	28	60	18	Headman	4	1	0	0	0	0	8	hunger; where to find school fees for pupils; health problems; water	1	3	7	1	3	7	expensive fertilizers; reduction in rainfall	1	6	0	1	6	0	misunderstanding in communication	5	0	5	0	yes
134	5803	G	2015-07-27	Batoka	5	M	1	37.91	7.42197	No	0	11:21:00	65	Married	2	S4	5	41	41	70	6	Inherited	2	0	1	0	0	0	13	water; school fees; health problems; how to improve family livelihood	1	3	8	1	3	8	expensive fertilizers and seeds	1	0	0	1	0	0	misunderstanding in communication	5	0	5	0	yes
135	5701	G	2015-07-27	Batoka	5	M	1	34.3792	4.80614	No	0	12:57:00	28	Single	1	Diploma	15	5	5	50	4	Inherited	2	0	1	0	0	0	11	improving the family livelihood	4	0	0	4	0	0	farming inputs; rainfall pattern because rain has decreased	1	6	0	1	6	0	misunderstanding in communication	5	0	5	0	yes
136	5704	G	2015-07-27	Batoka	5	M	1	34.7552	3.68438	No	0	14:20:00	55	Married	2	G7	7	37	37	30	9	Inherited	2	0	1	0	0	0	11	hugner because of poor rainfall pattern experienced this past farming season; health problem, and improving the family livelihood	7	9	8	7	9	8	late delivery of farming inputs from government	9	0	0	9	0	0	jealousy because of lacking development	6	0	6	0	yes
137	5601	G	2015-07-28	Batoka	5	M	1	33.9491	0.185789	Headman	1	09:15:00	30	Married	2	G7	7	9	9	90	14	Inherited	2	0	1	0	0	0	8	where to find money for school fees; food stuffs; health problems; improving the faily livelihood	3	7	8	3	7	8	expensive fertilizers, seeds, and late delivery of farming inputs	1	2	0	1	2	9	misunderstanding in communication	5	0	5	0	yes
138	5603	G	2015-07-28	Batoka	5	M	1	33.9581	1.81953	No	0	10:27:00	42	Married	2	G7	7	21	21	45	22	Inherited	2	0	1	0	0	0	7	where to find money for building a house; improving the family livelihood	4	0	0	4	0	0	expensive fertilizers and seeds	1	0	0	1	0	0	misunderstanding in communication	5	0	5	0	yes
139	5502	G	2015-07-28	Batoka	5	M	1	32.4172	3.35483	No	0	12:08:00	46	Married	2	G9	9	20	20	70	8	Inherited	2	0	1	0	0	0	22	water problems; hunger; how to improve the family livelihood; health problems; school fees	1	7	4	1	7	4	expensive fertilizers; reduction in rainfall pattern	1	6	0	1	6	0	lack of cooperation among people	5	0	5	0	yes
140	5504	G	2015-07-28	Batoka	5	M	1	31.3332	4.2279	No	0	12:57:00	42	Married	2	G7	7	15	15	20	8	Inherited	2	0	1	0	0	0	5	water; health problems; fees for school; lack of proper shelter	1	8	3	1	8	3	late delivery of farming inputs from farmer input support program	9	0	0	9	0	0	fighting among people because of hunger	1	0	1	0	yes
141	5503	R	2015-07-28	Batoka	5	M	1	31.4831	2.94652	No	0	12:58:00	41	Married	2	G12	12	15	2	70	9	Inherited	2	0	1	0	0	0	9	water problems; input prices are too high; school fees	1	2	3	1	2	3	farming input and implement prices are too high; market for farm produce is not there	1	2	11	1	2	11	not understanding each other	5	0	5	0	yes
142	5501	R	2015-07-28	Sinamanjolo	*	F	0	32.7775	2.45976	No	0	11:32:00	58	Married	2	G4	4	42	42	10	8	Headman	4	1	0	0	0	0	3	water worries; food due to poor harvest; where to get it	1	7	0	1	7	0	money for farming inputs; other crops ot support maize are not easily accessed	1	0	0	1	0	0	not having peace	3	0	3	0	yes
143	5604	R	2015-07-28	Batoka	5	M	1	34.4602	2.12312	No	0	10:35:00	35	Married	2	G9	9	5	5	50	9	Inherited	2	0	1	0	0	0	15	poor harvest due to drought; money for school fees	3	9	0	3	7	0	lack of farming inputs; droughts; animal diseases	1	6	5	1	6	5	not understanding one another	5	0	5	0	yes
144	5602	R	2015-07-28	Batoka	5	F	0	33.8927	0.599408	No	0	09:30:00	35	Married	2	G7	7	17	17	60	7	Inherited	2	0	1	0	0	0	10	poor rainfall pattern; animal diseases; late delivery of inputs	2	5	11	2	5	11	poor rainfall pattern; animal diseases; late delivery of inputs	5	6	9	5	6	9	differing in ideas	5	0	5	0	yes
145	5202	G	2015-07-29	Batoka	5	M	1	28.4132	3.53619	No	0	09:36:00	47	Married	2	G12	12	20	20	40	10	Inherited	2	0	1	0	0	0	11	improving the family livelihood; school fees for childred; health problems	3	4	8	3	4	8	lack of market for agricultural produce	11	0	0	11	0	0	misunderstanding in communication	5	0	5	0	yes
146	5204	G	2015-07-29	Batoka	5	M	1	28.8956	1.98151	No	0	10:26:00	75	Married	2	G5	5	54	54	20	5	Inherited	2	0	1	0	0	0	5	health problems; food; where to find money to meet other household needs	4	7	8	4	7	8	expensive fertilizers and seeds	1	0	0	1	0	0	misunderstanding in communication	5	0	5	0	yes
147	5102	G	2015-07-29	Batoka	5	F	0	25.4744	4.90098	No	0	11:37:00	24	Divorced	3	G12	12	1	1	30	10	Inherited	2	0	1	0	0	0	11	lack of proper shelter; where to find money for school fees; where to find food	3	4	7	3	4	7	expensive fertilizers and seeds	1	0	0	1	0	0	misunderstandings in communication	5	0	5	0	yes
148	5103	G	2015-07-29	Batoka	5	F	0	26.4502	3.69128	No	0	12:30:00	33	Married	2	G9	9	18	18	60	25	Inherited	2	0	1	0	0	0	12	where to find money to pay for school going children	3	0	0	3	0	0	a reduction in the rainfall pattern and expensive fertilizers and seeds	6	1	0	6	1	0	misunderstandings in communication	5	0	5	0	no
149	5201	R	2015-07-29	Batoka	5	F	0	28.0037	1.07479	No	0	09:03:00	49	Married	2	G7	7	5	5	30	3	Inherited	2	0	1	0	0	0	6	hunger; worries about safety; water source is far	1	7	0	1	4	7	lack of farming inputs and implements; poor rainfall	1	2	6	1	2	6	not living in harmony	3	0	3	0	yes
150	5203	R	2015-07-29	Batoka	5	F	0	28.6945	1.29074	No	0	10:12:00	64	Widow	4	G6	6	20	1	0	0	Purchased	1	0	0	1	0	0	4	food; no money for household needs; lack of farming inputs and implements; poor soil	2	4	7	2	4	7	no farming inputs and implements	1	2	0	1	2	0	verbal fighting	1	0	1	0	no
151	5104	R	2015-07-29	Batoka	5	F	0	26.7035	3.75653	No	0	12:44:00	40	Married	2	G7	7	21	13	20	31	Inherited	2	0	1	0	0	0	8	food security; safety of livestock; water availability	1	5	7	1	5	7	farming inputs are expensive; scarce rainfall pattern	1	6	0	1	6	0	not living in harmony	3	0	3	0	Yes
152	5101	R	2015-07-29	Batoka	5	F	0	25.6868	4.58974	No	0	11:26:00	61	Divorced	3	Graduate	17	25	24	20	9	Headman	4	1	0	0	0	0	10	water issues due to competition at the borehole	1	0	0	1	0	0	inputs are costly; market is not available for certain foods and products grown	1	11	0	1	11	0	not living in peace	3	0	3	0	Yes
153	5301	G	2015-07-30	Batoka	5	F	0	30.2629	0.715746	No	0	09:00:00	37	Married	2	G4	4	21	21	35	0	Inherited	2	0	1	0	0	0	9	how to feed the family; where to find money to pay for school going children; health problems	3	7	8	3	7	8	how to increase the size of production	8	0	0	8	0	0	misunderstanding in thoughts	5	0	5	0	Yes
154	5303	G	2015-07-30	Batoka	5	M	1	30.7824	0.809529	No	0	09:40:00	40	Married	2	G9	9	15	15	40	2	Inherited	2	0	1	0	0	0	10	where to find food; lack of proper shelter; school fees	3	4	7	3	4	7	expensive fertilizers, seeds, and farming implements	1	2	0	1	2	0	misunderstanding between two people over something	5	0	5	0	yes
155	5401	G	2015-07-30	Batoka	5	M	1	23.1278	0.48866	No	0	10:53:00	65	Married	2	S3	4	42	42	20	0	Inherited	2	0	1	0	0	0	4	where to find money to buy household needs; health problems particularly cancer	4	8	0	4	8	0	expensive fertilizers, seeds, and farming implements	1	2	0	1	2	0	misunderstanding in communication	5	0	5	0	yes
156	5404	G	2015-07-30	Batoka	5	M	1	20.5305	0.657171	No	0	11:55:00	24	Married	2	12	12	1	1	10	2	Inherited	2	0	1	0	0	0	4	where to find money to improve the family livelihood; how to further his education	3	4	0	3	4	0	expensive fertilizers, seeds , and a reduction in the rainfall pattern	1	2	6	1	2	6	absence of peace	3	0	3	0	yes
157	5302	R	2015-07-30	Batoka	5	M	1	30.6514	0.718822	No	0	09:05:00	40	Married	2	G9	9	5	4	20	0	Inherited	2	0	1	0	0	0	6	poor harvest; hunger	7	0	0	7	0	0	lack of farming inputs and implements; poor rainfall	1	2	6	1	2	6	misunderstandings	5	0	5	0	yes
158	5304	R	2015-07-30	Batoka	5	F	0	30.197	0.230537	No	0	09:57:00	42	Married	2	0	0	22	12	20	3	Headman	4	1	0	0	0	0	18	lack of inputs and implements; hunger; health issues; school fees for children	2	7	8	2	7	8	lack of implements and inputs	1	2	0	1	2	0	misunderstanding between people	5	0	5	0	yes
159	5402	R	2015-07-30	Batoka	5	F	0	22.8884	0.854195	No	0	11:00:00	19	Married	2	G9	9	1	1	20	0	Inherited	2	0	1	0	0	0	7	health issues	8	0	0	8	0	0	farming inputs	1	0	0	1	0	0	not getting along	5	0	5	0	yes
160	5403	R	2015-07-30	Batoka	5	M	1	22.2739	0.139219	No	0	11:42:00	34	Married	2	G9	9	2	2	15	6	Inherited	2	0	1	0	0	0	6	source of food; finding piece work	4	7	0	2	7	0	where to find farming inputs and implements	1	2	0	1	2	0	not living in harmony with people	5	0	5	0	yes
161	6801	G	2015-08-03	Choma A	6	M	1	18.9302	0.552333	No	0	09:10:00	27	Married	2	G7	7	3	3	30	0	Inherited	2	0	1	0	0	0	2	where to find food; health problems	7	8	0	7	8	0	expensive fertilizers and seeds; lack of farming implements	1	2	0	1	2	0	misunderstanding in communication	5	0	5	0	yes
162	6803	G	2015-08-03	Choma A	6	F	0	18.354	0.874624	No	0	09:40:00	43	Divorced	3	G7	7	4	4	10	0	Inherited	2	0	1	0	0	0	5	where to find food for the family; school fees; health problems	3	7	8	3	7	8	expensive fertilizers, seeds, and lack of farming implements	1	2	0	1	2	0	absence of peace	3	0	3	0	no
163	6701	G	2015-08-03	Choma A	6	M	1	16.8712	1.71063	No	0	10:50:00	68	Married	2	G9	9	45	45	30	3	Inherited	2	0	1	0	0	0	8	lackof proper shelter; school fees; health problems; how to improve the family livelihood	3	4	8	3	4	8	late delivery of farming in puts	9	0	0	9	0	0	misunderstanding in communication	5	0	5	0	yes
164	6703	G	2015-08-03	Choma A	6	F	0	14.532	0.454726	No	0	12:07:00	69	Widow	4	S4	5	51	51	35	2	Inherited	2	0	1	0	0	0	7	where to find food; school fees; health problems and improving the family livelihood	7	3	8	7	3	8	expensive fertilizers and seeds	1	0	0	1	0	0	misunderstanding in communication	5	0	5	0	no
165	6704	R	2015-08-03	Choma A	6	M	1	13.977	0.238692	Yes	1	12:10:00	66	Married	2	G7	7	46	39	45	4	Headman	4	1	0	0	0	0	10	food security; beddings; clothing; school fees	3	4	7	3	4	7	high cost of farming inputs and implements; labor access	1	2	4	1	2	4	not sharing the same idea	5	0	5	0	yes
166	6802	R	2015-08-03	Choma A	6	M	1	18.5431	0.773253	No	0	09:16:00	70	Married	2	0	0	39	39	20	0	Inherited	2	0	1	0	0	0	3	no money to buy inputs and implements; no household goods such as clothing; where to get money to pay someone to plow for him	2	4	0	2	4	0	no implements; no money to buy inputs and implements	2	1	0	2	1	0	not getting along with other people	5	0	5	0	Yes
167	6804	R	2015-08-03	Choma A	6	M	1	17.6383	1.12403	No	0	10:04:00	59	Married	2	Graduate	17	15	14	110	10	Headman	4	1	0	0	0	0	13	financially broke; school fees; need far more animals and livestock; poor soils so not productive; health issues	3	4	5	3	4	5	poor soils; poor rainfall pattern; has no idea of what crops can do best in these soils; lack of enough farming inputs and implements	7	6	1	7	6	1	quarreling	1	0	1	0	no
168	6702	R	2015-08-03	Choma A	6	F	0	15.5912	2.22251	No	0	11:08:00	72	Widow	4	0	0	52	17	30	4	Headman	4	1	0	0	0	0	4	spend much time looking out for their gardens; where to get money for farming inputs and implements; lack of better home structures; need electricity	2	4	0	2	4	0	lack of farming implements and inputs; rainfall pattern is poor; poor selling price compared to buying price of inputs	1	2	6	1	2	6	difference in areas	5	0	5	0	Yes
169	6501	G	2015-08-04	Choma A	6	F	0	6.97439	0.516678	No	0	09:40:00	69	Widow	4	S4	5	21	21	30	1	Purchased	1	0	0	1	0	0	12	water; hunger; health problems	1	7	8	1	7	8	lack of farming implements and expensive fertilizers	1	2	0	1	2	0	absence of peace	3	0	3	0	Yes
170	6503	G	2015-08-04	Choma A	6	F	0	6.55107	1.9907	No	0	10:55:00	59	Widow	4	G7	7	5	5	10	0	Inherited	2	0	1	0	0	0	3	food; lack of good shelter; health problems; water	1	4	7	1	4	7	expensive fertilizers and seeds; lack of farming implements	1	2	0	1	2	0	fighting among family members or people in the community	1	0	1	0	yes
171	6102	G	2015-08-04	Choma A	6	M	1	9.19186	0.552737	No	0	12:26:00	36	Married	2	G9	9	14	14	10	0	Inherited	2	0	1	0	0	0	4	improving the family livelihood	4	0	0	4	0	0	expensive fertilizers and seeds; lack of farming implements	1	2	0	1	2	0	misunderstanding in communication	5	0	5	0	yes
172	6103	G	2015-08-04	Choma A	6	F	0	9.34121	0.104597	No	0	13:15:00	20	Married	2	G7	7	1	1	5	0	Inherited	2	0	1	0	0	0	3	food; shelter; how to raise the standard of living	4	7	0	4	7	0	lack of farming implements and expensive fertilizers	1	2	0	1	2	0	fighting among people in the family or the community	1	0	1	0	yes
173	6502	R	2015-08-04	Choma A	6	F	0	6.06474	1.187	Yes	1	10:00:00	55	Married	2	G7	7	17	12	160	34	Government	5	0	0	0	1	0	10	water issues since the source is far; farming inputs and implements	1	2	0	1	2	0	farming inputs; rainfall is becoming little	1	6	0	1	6	0	not getting along	5	0	5	0	yes
174	6504	R	2015-08-04	Choma A	6	M	1	7.10335	2.175	No	0	11:00:00	53	Married	2	G12	12	13	13	100	12	Government	5	0	0	0	1	0	12	poor rainfall; water problems for animals; farming inputs are too small; worries about borehole breaking down	1	2	11	1	2	11	poor rainfall; small pack they get from government; animal vaccinations	1	5	6	1	5	6	misunderstanding between people	5	0	5	0	yes
175	6101	R	2015-08-04	Choma A	6	M	1	8.92495	0.333846	No	0	12:33:00	39	Married	2	G9	9	19	19	40	7	Inherited	2	0	1	0	0	0	9	hunger; where to get money to develop; lack of peace of mind due to family matters; school fees	3	4	7	3	4	7	faminly inputs are expensive; little land	1	7	0	1	7	0	verbal fights between people	1	0	1	0	yes
176	6104	R	2015-08-04	Choma A	6	M	1	9.57044	1.30514	No	0	13:30:00	50	Married	2	G7	7	35	35	60	30	Headman	4	1	0	0	0	0	12	food to feed family; water issues that prevents from doing projects that would bring them money	1	7	0	1	4	7	how to source farming inputs and implements	1	2	0	1	2	0	fighting or misunderstanding	1	5	1	5	yes
177	7701	G	2015-08-05	Choma B	7	M	1	14.9803	4.02912	No	0	09:35:00	66	Married	2	Cert*	15	14	14	45	3	Government	5	0	0	0	1	0	8	water; health problems; school fees	1	3	8	1	3	8	grazing area for livestock isn't enough because of	7	0	0	7	0	0	misunderstanding in communication	5	0	5	0	yes
178	7703	G	2015-08-05	Choma B	7	M	1	14.9461	3.41078	No	0	10:22:00	69	Married	2	Graduate	17	17	17	50	9	Government	5	0	0	0	1	0	3	water	1	0	0	1	0	0	poor rainfall pattern and infertile land	6	7	0	6	7	0	misunderstanding between human beings	5	0	5	0	yes
179	7601	G	2015-08-05	Choma B	7	M	1	9.63761	1.94332	No	0	11:55:00	32	Married	2	G7	7	5	5	10	0	Purchased	1	0	0	1	0	0	5	food; improving the family livelihood	4	7	0	4	7	0	expensive fertilizers and seeds	1	0	0	1	0	0	lack of development	6	0	6	0	yes
180	7603	G	2015-08-05	Choma B	7	M	1	9.55412	1.06954	No	0	12:37:00	43	Married	2	G9	9	20	20	10	0	Government	5	0	0	0	1	0	3	Improving the family livelihood	4	0	0	4	0	0	expensive fertilizers and seeds	1	0	0	1	0	0	misunderstanding in communication	5	0	5	0	yes
181	7702	R	2015-08-05	Choma B	7	M	1	15.0017	3.73885	No	0	09:45:00	35	Married	2	G7	7	17	1	40	10	Purchased	1	0	0	1	0	0	6	water problems; rainfall pattern; distance to school is far and it is too close to the highway; maintenance of boreholes; boreholes often locked and they don't have free access of water; no through roads	1	3	11	1	3	11	poor rainfall	6	0	0	6	0	0	not living in peace	3	0	3	0	yes
182	7704	R	2015-08-05	Choma B	7	M	1	14.572	3.02042	No	0	10:45:00	20	Married	2	G9	9	8	8	15	8	Purchased	1	0	0	1	0	0	3	where to get money to buy household things; water issues	1	4	0	1	4	0	how to source farming inputs and implements	1	2	0	1	2	0	not getting along	5	0	5	0	yes
183	7602	R	2015-08-05	Choma B	7	M	1	10.2605	1.1996	No	0	12:16:00	25	Married	2	G9	9	2	2	5	0	Leased	3	0	0	0	0	1	5	losing the farmer's property	10	0	0	10	0	0	money to source inputs and implements	1	2	0	1	2	0	misunderstanings between people	5	0	5	0	yes
184	7604	R	2015-08-05	Choma B	7	F	0	9.42815	0.923404	No	0	13:10:00	28	Married	2	G7	7	7	2	10	0	Government	5	0	0	0	1	0	5	farming inputs and implements; school fees	2	3	0	2	3	0	farming inputs and implements	1	2	0	1	2	0	not living in harmony	3	0	3	0	yes
185	7202	R	2015-08-06	Choma B	7	M	1	8.37292	1.8448	No	0	11:51:00	51	Married	2	G12	12	5	5	35	5	Inherited	2	0	1	0	0	0	5	financial problems	4	0	0	4	0	0	fariming inputs; rainfall patterns	1	6	0	1	6	0	misunderstandings between people	5	0	5	0	yes
186	7204	R	2015-08-06	Choma B	7	F	0	8.88865	1.72554	No	0	12:42:00	47	Married	2	G9	9	19	19	30	12	Inherited	2	0	1	0	0	0	5	poor harvest; when they do not have milk to sustain them; school fees	3	7	0	3	7	0	poor harvest; dry period for cattle is tricky for them	6	5	0	6	5	0	not getting along	5	0	5	0	yes
187	7502	R	2015-08-06	Choma B	7	F	0	5.28055	0.0655599	No	0	09:05:00	74	Married	2	G2	2	43	43	10	24	Purchased	1	0	0	1	0	0	4	poor harvest; no money to use for household needs	4	7	0	4	7	0	small packs collected from government	1	0	0	1	0	0	not living in harmony	5	0	5	0	no
188	7504	R	2015-08-06	Choma B	7	F	0	4.80508	0.130133	No	0	10:30:00	72	Widow	4	G7	7	52	20	30	4	Purchased	1	0	0	1	0	0	9	farming inputs and implements; health issues; where to get money for different needs	2	4	8	2	4	8	farming inputs and implements	1	2	0	1	2	0	misunderstanding in communication	5	0	5	0	yes
189	7501	G	2015-08-06	Choma B	7	F	0	5.6677	0.29706	No	0	08:57:00	58	Married	2	Graduate	17	9	9	70	18	Purchased	1	0	0	1	0	0	4	health problems	8	0	0	8	0	0	poor rainfall pattern; health problems in livestock	5	6	0	5	6	0	different ideas	5	0	5	0	yes
190	7503	G	2015-08-06	Choma B	7	F	0	5.30218	0.604784	No	0	10:22:00	77	Married	2	G8	8	8	8	20	0	Inherited	2	0	1	0	0	0	8	hunger; health problems	7	8	0	7	8	0	lack of farming implements; poor rainfall pattern	2	6	0	2	6	0	absence of peace	3	0	3	0	yes
191	7201	G	2015-08-06	Choma B	7	M	1	6.40598	0.249459	No	0	11:35:00	71	Married	2	G5	5	35	35	20	0	Purchased	1	0	0	1	0	0	4	food; health problems	7	8	0	7	8	0	lack of farming implements and expensive fertilizers and seeds	1	2	0	1	2	0	misunderstanding in communication	5	0	5	0	yes
192	7203	G	2015-08-06	Choma B	7	M	1	9.04734	1.25151	No	0	12:22:00	23	Married	2	G7	7	1	1	5	0	Purchased	1	0	0	1	0	0	2	improving the family livelihood	4	0	0	4	0	0	lack of farming implements; expensive fertilizers	1	2	0	1	2	0	misunderstanding in communication	5	0	5	0	no
193	8801	G	2015-08-10	Popota	8	M	1	19.2676	0.107723	No	0	10:30:00	68	Married	2	G7	7	35	35	20	8	Inherited	2	0	1	0	0	0	5	improving the family livelihood; food	4	7	0	4	7	0	expensive fertilizers and a reduction in the rainfall pattern	1	6	0	1	6	0	fighting among people	1	0	1	0	yes
194	8803	G	2015-08-10	Popota	8	F	0	20.6313	0.309725	No	0	11:20:00	38	Married	2	0	0	15	15	50	6	Inherited	2	0	1	0	0	0	11	health problems; food for the family	7	8	0	7	8	0	expensive fertilizers; reduction in the rainfall pattern	1	6	0	1	6	0	misunderstanding in communication	5	0	5	0	yes
195	8501	G	2015-08-10	Popota	8	M	1	18.3375	0.406721	No	0	12:45:00	28	Married	2	G7	7	5	5	20	0	Inherited	2	0	1	0	0	0	8	health problems; food; shelter; how to improve the livelihood	4	7	8	4	7	8	expensive fertilizers and the land is infertile	1	7	0	1	7	0	absence of peace	3	0	3	0	yes
196	8503	G	2015-08-10	Popota	8	F	0	17.7921	0.425849	No	0	13:45:00	45	Married	2	G3	3	10	10	20	0	Inherited	2	0	1	0	0	0	4	food: clothing; shelter; health problems; improving the family livelihood	4	7	8	4	7	8	lack of farming implements and expensive fertilizers; reduction in the rainfall pattern	1	2	6	1	2	6	misunderstanding in communication	5	0	5	0	yes
197	8802	R	2015-08-10	Popota	8	M	1	19.5539	0.0555242	No	0	10:41:00	49	Married	2	G8	8	29	29	20	2	Inherited	2	0	1	0	0	0	9	school fees; farming inputs and implements	2	3	0	2	3	0	farming inputs and implements	1	2	0	1	2	0	disagreements between people	5	0	5	0	yes
198	8804	R	2015-08-10	Popota	8	M	1	20.1608	0.41917	No	0	11:44:00	37	Married	2	G3	3	17	17	50	2	Rent	3	0	0	0	0	1	9	welfare of the family; future of the children; renting land is not easy; water availability	1	4	10	1	3	4	capital for farming inputs and implements; land is small and has rent	1	2	7	1	2	7	misunderstanding between people	5	0	5	0	yes
199	8502	R	2015-08-10	Popota	8	M	1	18.7111	1.12498	No	0	12:57:00	27	Married	2	G7	7	2	2	10	0	Inherited	2	0	1	0	0	0	5	farming inputs and implements; poor rainfall, no source of other livestock to sustain family	2	5	11	2	5	11	farming implements and inputs; poor rainfall	1	2	6	1	2	6	not getting along with people	5	0	5	0	yes
200	8504	R	2015-08-10	Popota	8	F	0	17.5225	0.472139	No	0	12:52:00	26	Married	2	G9	9	5	5	30	3	Inherited	2	0	1	0	0	0	4	lack of farming inputs and implements	2	0	0	2	0	0	lack of farming inputs and implements	1	2	0	1	2	0	misunderstandings between people	5	0	5	0	yes
201	8601	G	2015-08-11	Popota	8	F	0	17.4002	0.927394	No	0	09:12:00	35	Married	2	G7	7	10	10	80	12	Inherited	2	0	1	0	0	0	9	water; health problems; school fees; improving the family livelihood	1	8	3	1	8	3	expensive fertilizers; reduction in the rainfall pattern	1	6	0	1	6	0	misunderstanding in the way people live	5	0	5	0	yes
202	8603	G	2015-08-11	Popota	8	F	0	18.0348	0.379889	No	0	09:56:00	46	Married	2	G7	7	31	31	240	18	Inherited	2	0	1	0	0	0	12	water; how to improve the family living standard to a better one	1	4	0	1	4	0	expensive fertilizers and seeds; lack of market for agricultural produce	1	11	0	1	11	0	fighting among people in the family or the community	1	0	1	0	yes
203	8402	G	2015-08-11	Popota	8	M	1	16.9812	1.05219	Headman	1	11:33:00	86	Married	2	G1	1	58	58	20	0	Inherited	2	0	1	0	0	0	3	health problems; poverty; food for the family	4	7	8	4	7	8	expensive fertilzers and lack of farming implements	1	2	0	1	2	0	absence of peace	3	0	3	0	yes
204	8403	G	2015-08-11	Popota	8	M	1	16.6487	0.0336553	Headman	1	12:15:00	75	Married	2	G5	5	37	37	20	6	Inherited	2	0	1	0	0	0	6	food; health problems; lack of proper shelter	4	7	8	4	7	8	late delivery of farming implements; reduction in the rainfall pattern	2	6	9	2	6	9	absence of peace in the community	3	0	3	0	yes
205	8602	R	2015-08-11	Popota	8	M	1	17.1246	1.44143	No	0	09:20:00	39	Married	2	G7	7	6	6	30	15	Inherited	2	0	1	0	0	0	9	source of farming inputs; ways of getting vaccines for his livestock; health issues	2	5	8	2	5	8	source of farming inputs; diseases might leave him without livestock	1	5	0	1	5	0	not sharing the same idea	5	0	5	0	yes
206	8604	R	2015-08-11	Popota	8	M	1	17.3244	0.364848	Yes	1	10:23:00	48	Married	2	G9	9	5	5	60	2	Headman	4	1	0	0	0	0	16	water issues; lack of dip tank for the animals; hunger issues due to poor harvest	1	5	7	1	5	7	poor rainfall; farming inputs	1	6	0	1	6	0	misunderstanding in communication	5	0	5	0	yes
207	8401	R	2015-08-11	Popota	8	F	0	16.557	0.72234	No	0	11:33:00	83	Widow	4	0	0	34	34	20	0	Headman	4	1	0	0	0	0	10	health issues	8	0	0	8	0	0	expensive inputs and implements	1	2	0	1	2	0	misunderstanding between people	5	0	5	0	no
208	8404	R	2015-08-11	Popota	8	F	0	15.1221	0.13283	No	0	12:25:00	49	Single	1	G4	4	5	0	0	4	Headman	4	1	0	0	0	0	4	food for the children; clothing; beddings; worries about how to source farming inputs	2	4	7	2	4	7	source of farming inputs	1	0	0	1	0	0	misunderstanding in communication	5	0	5	0	no
209	8301	G	2015-08-12	Popota	8	F	0	14.2535	0.213921	No	0	09:10:00	34	Married	2	G5	5	7	7	10	0	Inherited	2	0	1	0	0	0	4	poverty; lack of food; how to improve the family livelihood	4	7	0	4	7	0	expensive fertilizers; reduction in the rainfall pattern	1	6	0	1	6	0	absence of peace	3	0	3	0	yes
210	8302	G	2015-08-12	Popota	8	M	1	14.7665	0.208254	No	0	10:00:00	57	Married	2	G7	7	30	30	45	1	Inherited	2	0	1	0	0	0	8	hunger; health problems; fees for school going children	3	7	8	3	7	8	lack of farming implements; expensive farming inputs	1	2	0	1	2	0	misunderstanding in communication	5	0	5	0	yes
211	8703	G	2015-08-12	Popota	8	F	0	14.5196	0.271441	No	0	10:50:00	38	Married	2	G7	7	20	20	50	19	Inherited	2	0	1	0	0	0	15	food; lack of proper shelter; where to find money for school going children	3	4	7	3	4	7	expensive fertilizers; reduction in the rainfall pattern	1	6	0	1	6	0	misunderstanding in communication	5	0	5	0	yes
212	8303	G	2015-08-12	Popota	8	F	0	9.52046	0.32653	No	0	12:07:00	38	Married	2	8	0	5	5	50	0	Inherited	2	0	1	0	0	0	8	improving the family livelihood	4	0	0	4	0	0	expensive fertilizers; lack of farming implements	1	2	0	1	2	0	absence of peace	3	0	3	0	yes
213	8701	R	2015-08-12	Popota	8	M	1	14.6522	0.209286	No	0	09:20:00	29	Married	2	G11	11	3	3	60	5	Inherited	2	0	1	0	0	0	5	school fees; farming inputs; feeding the growing family	2	3	7	2	3	7	farming inputs; land is small; rainfall pattern	1	6	7	1	6	7	not sharing the same idea	5	0	5	0	yes
214	8702	R	2015-08-12	Popota	8	M	1	14.1833	0.0343839	No	0	10:40:00	85	Married	2	G8	8	43	43	10	0	Headman	4	1	0	0	0	0	5	food has not been enough; clothing; beddings; no source of money	4	7	0	4	7	0	farming inputs and implements	1	2	0	1	2	0	fighting	1	0	1	0	yes
215	8704	R	2015-08-12	Popota	8	M	1	14.0603	0.0489114	No	0	11:50:00	40	Married	2	G10	10	12	12	15	0	Inherited	2	0	1	0	0	0	5	health issues; school is far; farming implements; no capital; no help from society in terms of farming; water problems (souce is far); poor network	1	2	3	1	2	3	farming implements and inputs; no help from society in terms of farming; no vaccines for his livestock	1	2	3	1	2	3	not getting along in society	5	0	5	0	yes
216	8304	R	2015-08-12	Popota	8	F	0	8.91837	0.514832	Yes	1	12:23:00	71	Married	2	Graduate	17	17	17	60	36	Purchased	1	0	0	1	0	0	12	school fees; improving the farm; basic needs; need for a proper, balanced diet	2	3	4	2	3	4	farming implements are expensive especially conservation farming; less fertilizer packs and buying is expensive	2	1	0	2	1	0	not getting along or sharing different ideas	5	0	5	0	yes
217	8201	G	2015-08-13	Popota	8	F	0	9.8138	1.87367	Yes	1	08:55:00	38	Married	2	G5	5	20	20	10	14	Purchased	1	0	0	1	0	0	8	school fees; how to improve the family livelihood	3	4	0	3	4	0	expensive farming inputs; reduction in the rainfall pattern	1	6	0	1	6	0	absence of peace in the family or community	3	0	3	0	yes
218	8203	G	2015-08-13	Popota	8	M	1	10.679	2.0716	No	0	09:42:00	57	Married	2	G4	4	41	41	25	2	Government	5	0	0	0	1	0	8	food; school fees; health problems; improving the family livelihood	3	7	8	3	7	8	expensive fertilizers; reduction in the rainfall pattern; lack of market for agricultural produce	1	6	11	1	6	11	fighting among people	1	0	1	0	yes
219	8101	G	2015-08-13	Popota	8	F	0	8.05957	0.202885	No	0	10:48:00	73	Married	2	G3	3	22	22	30	30	Government	5	0	0	0	1	0	9	health problems; food; lack of proper shelter	4	7	8	4	7	8	expensive fertilizers; not enough land for farming	1	7	0	1	7	0	misunderstanding in communication	5	0	5	0	yes
220	8103	G	2015-08-13	Popota	8	F	0	6.29418	0.104021	No	0	11:39:00	35	Married	2	G7	7	18	18	40	8	Government	5	0	0	0	1	0	10	how to improve the family livelihood; health problems; hunger	4	7	8	4	7	8	expensive fertilizers and seeds; a reduction in rainfall	1	6	0	1	6	0	fighting among people because of lack of development	6	0	6	0	yes
221	8202	R	2015-08-13	Popota	8	M	1	12.6058	4.12584	No	0	09:15:00	55	Married	2	G7	7	39	1	80	25	Leased	3	0	0	0	0	1	9	farming inputs	2	0	0	2	0	0	farming inputs	1	0	0	1	0	0	not sharing the same idea	5	0	5	0	yes
222	8204	R	2015-08-13	Popota	8	F	0	8.96052	1.12972	No	0	10:36:00	60	Married	2	G9	9	3	3	40	17	Purchased	1	0	0	1	0	0	5	poor rainfall; area is infested with termites	11	0	0	5	11	0	area is infested with termites; poor rainfall	6	12	0	6	12	0	misunderstanding in communication	5	0	5	0	yes
223	8102	R	2015-08-13	Popota	8	M	1	7.8651	1.0947	No	0	11:15:00	60	Married	2	G6	6	41	16	35	5	Government	5	0	0	0	1	0	15	feeding the family; school fees; farming inputs and implements; health issues	2	3	7	2	3	7	farming inputs and implements are expensive; no source of capital	1	2	0	1	2	0	not getting along	5	0	5	0	yes
224	8104	R	2015-08-13	Popota	8	F	0	6.68639	0.0694286	No	0	12:14:00	60	Widow	4	G7	7	15	15	20	0	Government	5	0	0	0	1	0	11	no farming implements and inputs; where to get money	2	4	0	2	4	0	no farming implements and inputs	1	2	0	1	2	0	misunderstanding between people	5	0	5	0	no
[truncated: 195 more columns]

## Sheet: Code Sheet
Question Number	Variable name	Actual Question in Survey	Explanation of how variable is coded	Notes and recoding in SAS	General notes
	ID	None: Added to top of every survey. Unique identifier	ID of participant
	Waypoint		None: Handwritten on survey. Four digits. First is camp, second is zone within camp, and the third and fourth are household number within zone (always less than 5).	1 = Mboole; 2 = Mbabala; 3 = Sibanyati; 4 = Singani; 5 = Batoka; 6 = Choma A; 7 = Choma B; 8 = Papota
	Enumerator	Enumerator	R for Rose, G for Godwin, A for Allan
	Date	Date:	XX-MONTH
	Camp	Camp	Camp Name
	CampV	Camp	Camp Number	1 = Mboole; 2 = Mbabala; 3 = Sibanyati; 4 = Singani; 5 = Batoka; 6 = Choma A; 7 = Choma B; 8 = Papota
	Village	Village:	Village Name		Removed to protect identities
	Gender	Gender:	M = Male F = Female
	GenderV	Gender:	1 = Male 0 = Female
	GPS_S	GPS: S	DD.DDDDD	WGS 84 coordinate system	Removed to protect identities
	GPS_E	GPS:E	DDD.DDDDD		Removed to protect identities
	UTM_Lat	GPS: S converted to UTM.	S UTM Grid		Removed to protect identities
	UTM_Long	GPS: E converted to UTM.	E UTM Grid		Removed to protect identities
	Dist_Choma	Distance from household to center of Choma town.	In Kilometers
	Dist_ISR	Distance from household to nearest improved surface road.	In Kilometers
	Zone_Leader	Zone Leader?	Yes, No	1,0
	Zone_LeaderV	Zone Leader?	1 = Yes 0 = No	1,0
	Time	Time of day:	In 24-hour time
1	Name	What is your name?	First Name		Removed to protect identities
1a	Age	What is your age?	In years
1b	Married	What is your marital status?	Married, Single, Divorced, Widowed
	MarriedV	Marital status.	1 = Single, 2 = Married, 3 = Divorced, 4 = Widowed
1c	Education	What is your highest education level?	G = Grade, S = Standard, F = Form	Grade = Standard + 1	Form 1 = G7
	EducationV	What is your highest education level?	Converted grade of education.		Graduate = G12+5, Certificate = G12+3
2	Years_Farmer	How long have you been your own farmer?	In years
3	Farming_Here	Since you have become your own farmer, when did you start farming here?	In years
4	KG_Seed	How many kilograms of maize seed did you plant in the last farming season?	In kilograms
5	Cattle	How many cattle do you have?	Total number
6	Rights	How did you obtain the rights to the land you will cultivate this year? Check all that apply.	Purchased, Inherited, Rent or Lease, or Headman
	RightsV	How did you obtain the rights to the land you will cultivate this year? Check all that apply.	1 = Purchased, 2 = Inherited, 3 = Rent or Lease, 4 = Headman, 5 = Government, 6 = Other	1 = Purchased, 2 = Inherited, 3 = Rent or Lease, 4 = Headman, 5 = Government, 6 = Other
	HeadmanV	Land rights given by Headman or not.	1 = Yes 0 = No	1,0
	InheritedV	Land rights were inherited or not.	1 = Yes 0 = No	1,0
	PurchasedV	Land rights were purchased or not.	1 = Yes 0 = No	1,0
	GovtV	Land rights were granted by government or not.	1 = Yes 0 = No	1,0
	RentV	Land rights were rented / leased or not.	1 = Yes 0 = No	1,0
7	HH_Members	How many household members usually eat at this residence?	Total number
8a	Worries	What are your main worries (kulibilika / mizezo)? General worries [open ended]	Word for word
	z8a_d1	First general worry reported.	0 = No response, 1 = Water access and variabitlity, 2 = Farming inputs, 3 = Education access, 4 = Livelihood and economic mobility, 5 = Animal or livestock issues, 6 = Health care access, 7 = Food security and access, 8 = Personal or family member health issues, 9 = Rainfall for crops or farming, 10 = Land access or availability, 11 = Rainfall distribution		d = Coded by Drew
	z8a_d2	Second general worry reported.			y = Coded by Yu
	z8a_d3	Third general worry reported.
	z8a_y1	First general worry reported.
	z8a_y2	Second general worry reported.
	z8a_y3	Third general worry reported.
8b	Farm_Worries	What are your main worries (kulibilika / mizezo)? Specific worries related to farming [open ended]	Word for word
	z8b_d1	First farming worry reported.	0 = No response, 1 = Fertilizers and seeds (inputs), 2 = Implements, 3 = Human labor, 4 = Animal labor, 5 = Livestock disease / vaccination, 6 = Rainfall, 7 = Land, 8 = Output increase, 9 = Late delivery of inputs from government subsidy, 10 = Not enough water, 11 = Market access, 12 = Other
	z8b_d2	Second farming worry reported.
	z8b_d3	Third farming worry reported.
	z8b_y1	First farming worry reported.
	z8b_y2	Second farming worry reported.
	z8b_y3	Third farming worry reported.
9	Conflict	How would you define conflict (kuzwangana / kujumbana / kwimpana)? [open ended]	Word for word
	z9_d1	First definition of conflict reported.	0 = No response, 1 = Verbal fighting / arguing (individual), 2 = Physical fighting, 3 = Absence of peace, 4 = Verbal fighting / arguing (community), 5 = Misunderstanding, miscommunication, or not getting along, 6 = Imbalanced development ie not enough, others have more, etc., 7 = Spousal Issues, 8 = Other
	z9_d2	Second definition of conflict reported.
	z9_y1	First definition of conflict reported.
	z9_y2	Second definition of conflict reported.
10	Conflict_Past	Based on your definition, have you observed conflict around your area in the past ten years?	Yes, No	1,0
	Conflict PastV	Based on your definition, have you observed conflict around your area in the past ten years?	1 = Yes 0 = No	1,0
10a	Sources_Past	What were the sources of the conflict you observed (please be specific)? [open ended]	Word for word
	z10a_d1	First source of past conflict reported.	0 = No response, 1 = Land grabbing / access, 2 = Crop damage by animals, 3 = Alcohol consumption, 4 = Sporting events, 5 = Sharing of farming inputs / cooperation, 6 = Politics, 7 = Property damage by humans, 8 = Gender based arguments and issues, 9 = Lack of support or development, 10 = Tribal issues or tribalism, 11 = Household disagreements, 12 = Food security / hunger, 13 = Money / finances, …
	z10a_d2	Second source of past conflict reported.
	z10a_d3	Third source of past conflict reported.
	z10a_y1	First source of past conflict reported.
	z10a_y2	Second source of past conflict reported.
	z10a_y3	Third source of past conflict reported.
10b	Type_Past	How did the conflict manifest (cakalitondezya buti)? [open ended]	Word for word
	Past_VerbalV	Form of past conflict was verbal only.	1 = Yes 0 = No	1,0
	Past_PhysicalV	Form of past conflict was physical only.	1 = Yes 0 = No	1,0
	Past_VerbPhysV	Form of past conflict was verbal and physical.	1 = Yes 0 = No	1,0
10c	You_Past	How did this this source of conflict affect you? [open ended]	Word for word
	z10c_d1	First personal effect reported.	0 = No response, 1 = Intrapersonal stress, 2 = Expected potential future conflicts or unrest, 3 = Financial or economic hardship, 4 = Farming programs disturbed, 5 = Food hardship, 6 = Not affected or no effects, 7 = Family programs disturbed, 8 = Development disturbed, 9 = Other
	z10c_d2	Second personal effect reported.
	z10c_y1	First personal effect reported.
	z10c_y2	Second personal effect reported.
10d	Community_Past	How did this source of conflict affect your community?	Word for word
	z10d_d1	First community effect reported.	0 = No response, 1 = Community expressed disapproval of the final outcome of the conflict, 2 = Delay or disrupt development, 3 = Community expressed approval of, or satisfaction with, the final outcome of the conflict, 4 = Non-community oriented response, 6 = Divides community, 7 = Disturbs cooperation, 8 = No peace or continued unrest, 9 = Community level farming disturbances, 10 = Community lev…
	z10d_d2	Second community effect reported.
	z10d_d3	Third community effect reported.
	z10d_y1	First community effect reported.
	z10d_y2	Second community effect reported.
	z10d_y3	Third community effect reported.
11	Conflict_Future	Based on your definition, do you expect any forms of conflict around your area in the next ten years?	Yes, No	1,0
	Conflict_FutureV	Based on your definition, do you expect any forms of conflict around your area in the next ten years?	1 = Yes 0 = No	1,0
11a	Source_Future	What do you think will be the source of this conflict (please be specific)? [open ended]	Word for word
	z11a_d1	First source of expected future conflict reported.	0 = No response, 1 = Land grabbing / access, 2 = Crop damage by animals, 3 = Alcohol consumption, 4 = Sporting events, 5 = Sharing of farming inputs / cooperation, 6 = Politics, 7 = Property damage by humans, 8 = Gender based arguments and issues, 9 = Lack of support or development, 10 = Tribal issues or tribalism, 11 = Household disagreements, 12 = Food security / hunger, 13 = Money / finances, …
	z11a_d2	Second source of expected future conflict reported.
	z11a_d3	Third source of expected future conflict reported.
	z11a_y1	First source of expected future conflict reported.
	z11a_y2	Second source of expected future conflict reported.
	z11a_y3	Third source of expected future conflict reported.
11b	Form_Future	How do you expect conflict to manifest (ciyolitondezya buti)? [open ended]	Word for word
	Future_VerbalV	Expected form of future conflict is verbal only.	1 = Yes 0 = No	1,0
	Future_PhysicalV	Expected form of future conflict is physical only.	1 = Yes 0 = No	1,0
	Future_VerbPhysV	Expected form of future conflict is verbal and physical.	1 = Yes 0 = No	1,0
12	Violent_Future	Do you expect any physical violence in the next ten years?	Yes, No	1,0
	Violent_FutureV	Do you expect any physical violence in the next ten years?	1 = Yes 0 = No	1,0
12a	Violent_Explain	If yes, please explain [open ended]	Word for word
	z12a_d1	First explanation for future violent conflict reported.	0 = No response, 1 = Misunderstanding that escalates, 2 = Lack of 3rd party intervention, 3= Lack of positive social norms or rules, 4 = Religious based, 5 = Politics, 6 = Tribal issues or Tribalism, 7 = Cattle or animal damage, 8 = Spousal issues, 9 = Land grabbing or boundary issues, 10 = Population increase, 11 = Alcohol consumption, 12 = Other, 13 = Theft, 14 = Water
	z12a_d2	Second explanation for future violent conflict reported.
	z12a_y1	First explanation for future violent conflict reported.
	z12a_y2	Second explanation for future violent conflict reported.
13	Water_Use	How much water does your household use for all domestic activities per day?	In liters
14	Water_Share	Have you ever shared water with your neighbors?	Yes, No	1,0
	Water_ShareV	Have you ever shared water with your neighbors?	1 = Yes 0 = No	1,0
14a	Share_Frequency	If yes, how often?	Frequency reported
	Share_FreqV	How often water is shared.	Shares per year.
14b	Share_Quantity	If yes, how much water was shared on that occasion?	In liters per time shared.
15	Water_Ask	Have you ever asked for water from your neighbors?	Yes, No	1,0
	Water AskV	Have you ever asked for water from your neighbors?	1 = Yes 0 = No	1,0
15a	Ask_Decline	Have you ever asked for water and your neighbor refused?	Yes, No	1,0
	Ask_DeclineV	Have you ever asked for water and your neighbor refused?	1 = Yes 0 = No	1,0
15b	Ask_Explain	If yes, explain [open ended]	Word for word
	Ask_ExplainV	Explanation as to why refused.	1 = Neighbor also did not have water
16	Water_Sources	What are your main sources of water? Check all that apply.	Communal borehole, private borehole, communal well, private well, dam, pond, tap, river or stream, or other
	Total_SourcesV	Total number of main sources reported in Q16.	Total number	sum of total sources
	Comm_BoreholeV	Access to communal borehole or not.	1 = Yes 0 = No	1,0
	Priv_BoreholeV	Access to a private borehole or not.	1 = Yes 0 = No	1,0
	Comm_WellV	Access to a communal well or not.	1 = Yes 0 = No	1,0
	Priv_WellV	Access to a private well or not.	1 = Yes 0 = No	1,0
	DamV	Access to a dam or not.	1 = Yes 0 = No	1,0
	PondV	Access to a pond or not.	1 = Yes 0 = No	1,0
	RiverV	Access to a river or stream, or not.	1 = Yes 0 = No	1,0
17	Fetch	Does the water you use have to be fetched?	Yes, No	1,0
	FetchV	Does the water you use have to be fetched?	1 = Yes 0 = No	1,0
17a	Fetch_Time	How long does it take to travel to your main source of water one-way?	In miniutes
17b	Fetch_Mode	What modes of transport are used to fetch the water?	Word for word
	WalkingV	Walking to fetch or not.	1 = Yes 0 = No	1,0
	OxCartV	Ox cart to fetch or not.	1 = Yes 0 = No	1,0
	BicycleV	Bicycle to fetch or not.	1 = Yes 0 = No	1,0
17c	Fetch_Trips	How many round trips are made per day?	Trips per day
17d	Fetch_Line	What is the longest time your household member had to wait in line to fetch water?	In minutes
18	Storage	Do you have any forms of water storage?	Yes, No	1,0
	StorageV	Do you have any forms of water storage?	1 = Yes 0 = No	1,0
18a/b	Storage_Size	a. What are the sizes of the main water storage containers that you have? [Fill in table] & b. For each size, how many do you have of each? [Fill in table]	Size/type x number of units
	Storage_SizeV	Total water storage capacity	Liters of storage capacity
19	Treat	Do you currently treat your drinking water?	Yes, No	1,0
	TreatV	Do you currently treat your drinking water?	1 = Yes 0 = No	1,0
19a	Treat_How	If yes, how? [open ended]	Treatment type
	BoilV	Treat water by boiling or not.	1 = Yes 0 = No	1,0
	ChlorineV	Treat water with chlorine or not.	1 = Yes 0 = No	1,0
20	Sick	Have you or any of your family members ever become sick from drinking water?	Yes, No	1,0
	SickV	Have you or any of your family members ever become sick from drinking water?	1 = Yes 0 = No	1,0
20a	Sick_Source	What water source do you believe caused the sickness?	Reported source
	Sick_PondV	Sick from pond or not.	1 = Yes 0 = No	1,0
	Sick_StreamV	Sick from stream or not.	1 = Yes 0 = No	1,0
	Sick_OtherV	Sick from other source or not.	1 = Yes 0 = No	1,0
20b	Sick_When	When did the sickness occur?	Event year
	Sick_WhenV	Years since last sickness event occurred.	Years
20c	Sick_Symptoms	What were the symptoms of the sickness?	Symptoms reported
	Sick_diarrheaV	Experienced diarrhea or not.	1 = Yes 0 = No	1,0
	Sick_vomitingV	Experienced vomiting or not.	1 = Yes 0 = No	1,0
	Sick_painsV	Experienced stomach pains or not.	1 = Yes 0 = No	1,0
20d	Sick_Treatment	How was the sickness treated?	Treatment type
	Treat_ClinicV	Sickness treated at clinic or not.	1 = Yes 0 = No	1,0
	Treat_CharcoalV	Sickness treated with charcoal or not.	1 = Yes 0 = No	1,0
	Treat_HomeV	Sickness treated with home remedy or not.	1 = Yes 0 = No	1,0
21a	HHWater_Past	[domestic household needs] Have you had enough water in the past ten years?	Yes, No	1,0
	HHWater_PastV	[domestic household needs] Have you had enough water in the past ten years?	1 = Yes 0 = No	1,0
21b	HHWater_Present	[domestic household needs] Have you had enough water this year?	Yes, No	1,0
	HHWater_PresentV	[domestic household needs] Have you had enough water this year?	1 = Yes 0 = No	1,0
21c	HHWater_Future	[domestic household needs] Based on your experience, do you think you will have enough water next year?	Yes, No	1,0
	HHWater_FutureV	[domestic household needs] Based on your experience, do you think you will have enough water next year?	1 = Yes 0 = No	1,0
22a	Cattle_Past	[cattle water needs] Have you had enough water in the past ten years?	Yes, No	1,0	if blank, it means the participant did not have any cattle.
	Cattle_PastV	[cattle water needs] Have you had enough water in the past ten years?	1 = Yes 0 = No	1,0
22b	Cattle_Present	[cattle water needs] Have you had enough water this year?	Yes, No	1,0
	Cattle_PresentV	[cattle water needs] Have you had enough water this year?	1 = Yes 0 = No	1,0
22c	Cattle_Future	[cattle water needs] Based on your experience, do you think you will have enough water next year?	Yes, No	1,0
	Cattle_FutureV	[cattle water needs] Based on your experience, do you think you will have enough water next year?	1 = Yes 0 = No	1,0
23a	Crop_Past	[field crop water needs] Have you had enough water in the past ten years?	Yes, No	1,0
	Crop_PastV	[field crop water needs] Have you had enough water in the past ten years?	1 = Yes 0 = No	1,0
23b	Crop_Present	[field crop water needs] Have you had enough water this year?	Yes, No	1,0
	Crop_PresentV	[field crop water needs] Have you had enough water this year?	1 = Yes 0 = No	1,0
23c	Crop_Future	[field crop water needs] Based on your experience, do you think you will have enough water next year?	Yes, No	1,0
	Crop_FutureV	[field crop water needs] Based on your experience, do you think you will have enough water next year?	1 = Yes 0 = No	1,0
23aa	Ration	In the past five years, did you have to ration your food for your household members?	Yes, No	1,0	USDA Food Security Module
	RationV	In the past five years, did you have to ration your food for your household members?	1 = Yes 0 = No	1,0
23bb	Ration_Why	If yes, explain why [open ended]	Word for word
	Ration_RainV	Rationed due to rainfall shortage.	1 = Yes 0 = No	1,0
	Ration_InputV	Rationed due to farming inputs shortage.	1 = Yes 0 = No	1,0
	Ration_RainInputV	Rationed due to rainfall and inputs shortages.	1 = Yes 0 = No	1,0
	Ration_OtherV	Rationed to other reasons.	1 = Yes 0 = No	1,0
23cc	Ration_How	If yes, explain how [open ended]	Word for word
	Ration_HowV	How food was rationed.	1 = Skipped meals, 2 = Reduced portion size, 3 = Restricted diet (food type), 4 = Other
	How_SkipV	Rationed by skipping meals.	1 = Yes 0 = No	1,0
	How_SizeV	Rationed by reducing portion size.	1 = Yes 0 = No	1,0
	How_DietV	Rationed by restricting diet (food type).	1 = Yes 0 = No	1,0
	How_OtherV	Rationed by other methods not listed.	1 = Yes 0 = No	1,0
	How_SkipDietV	Rationed by skipping meals and restricing diet.	1 = Yes 0 = No	1,0
	How_SkipOtherV	Rationed by skipping meals and other.	1 = Yes 0 = No	1,0
	How_SizeDietV	Rationed by reducing portion size and restricting diet.	1 = Yes 0 = No	1,0
24	Rain_Past	In the past ten years, how has the annual amount of rainfall changed?	Increased, Decreased, or No Change
	Rain_PastV	In the past ten years, how has the annual amount of rainfall changed?	0 = Decreased, 1 = No Change, 2 = Increased	0,1,2
25	Rain_Future	Next year, how do you think the annual rainfall amount will be compared to last year?	Increased, Decreased, or No Change
	Rain_FutureV	Next year, how do you think the annual rainfall amount will be compared to last year?	0 = Decreased, 1 = No Change, 2 = Increased	0,1,2
26	Rain_Distribution	In the past ten years, how has the rainfall distribution changed during the growing season?	Word for word
	z26_d1	First change in seasonal rainfall distribution reported.	0 = No response, 1 = Increase in droughts and dry spells, 2 = Increase in floods, 3 = More droughts than floods, 4 = More floods than droughts, 5 = Increase in floods and droughts, 6 = Good years (even distribution), 7 = Oscillatory pattern, 8 = Timing of rain has changed, 9 = Other damages in pattern, 10 = No changes at all, 11 = Other
	z26_d2	Second change in seasonal rainfall distribution reported.
	z26_d3
	z26_y1	First change in seasonal rainfall distribution reported.
	z26_y2	Second change in seasonal rainfall distribution reported.
	z26_y3
27	Rain_Onset	In the past ten years, how sure have you been about when the rains will start?	Sure or Unsure
	Rain_OnsetV	In the past ten years, how sure have you been about when the rains will start?	1 = Sure 0 = Unsure	1,0
27a	Onset_Explain	Explain [open ended]	Word for word
	z27a_d1	Reason for (un)certainty reported.	1 = Traditional signs (nature & weather patterns), 2 = Dates, 3 = Weather forecasts, 4 = Do not utilize any source, 5 = Other
	z27a_y1	Reason for (un)certainty reported.
28	Meetings	Do you attend community meetings where water issues are discussed?	Yes, No	1,0
	MeetingsV	Do you attend community meetings where water issues are discussed?	1 = Yes 0 = No	1,0
28a	Meetings_Issues	What are the main issues discussed? [open ended]	Topics reported
	z28a_d1	First issue reported.	0 = No response, 1 = Water access, 2 = Water treatment methods, 3 = Water source maintenance, 4 = Water conservation, 5 = General water management, 6 = Water resource development (borehole), 7 = Water resource development (other sources), 8 = Other
	z28a_d2	Second issue reported.
	z28a_d3	Third issue reported.
	z28a_y1	First issue reported.
	z28a_y2	Second issue reported.
	z28a_y3	Third issue reported.
28b	Meetings_Frequency	How often are these meetings held? [open ended]	Frequency reported
	Meetings_FrequencyV	How often meetings about water issues are held.	Meetings per year
29	Disputes_Past	In past ten years, have you ever observed any disputes over water?	Yes, No	1,0
	Disputes_PastV	In past ten years, have you ever observed any disputes over water?	1 = Yes 0 = No	1,0
29a	Past_Explain	Explain [open ended]	Word for word
	z29a_d1	First explanation for dispute reported.	If Yes: 1 = Fetch line issues, 2 = Shortage of boreholes, 3 = Over-extracting of water by individual, 4 = Water resource development cooperation or maintenance, 5 = Water shortage or scarcity, 6 = Priority of water usage, 7 = Other. If No: 11 = Sufficient water acces, 12 = Cultural, social, or religious norms, 13 = Other
	z29a_d2	Second explanation for dispute reported.
	z29a_y1	First explanation for dispute reported.
	z29a_y2	Second explanation for dispute reported.
29b	Past_Resolve	How do people usually resolve the disputes?	Word for word
	z29b_d1	First resolution method reported.	0 = No response, 1 = Communicate and self-resolve, 2 = Disputes taken to water committee and solved, 3 = Disputes taken to the Headman or Chairmen and solved, 4 = On going or not resolved, 5 = Other
	z29b_d2	Second resolution method reported.
	z29b_y1	First resolution method reported.
	z29b_y2	Second resolution method reported.
30	Dispute_Future	In the next ten years, how do you expect the number of disputes over water to change?	Decreased, Increased, No Change
	Dispute_FutureV	In the next ten years, how do you expect the number of disputes over water to change?	0 = Decreased, 1 = No Change, 2 = Increased	1,0
30a	Future_Explain	Please explain [open ended]	Word for word
	z30a_d1	First explanation for future disputes reported.	0 = No response; If Increase: 11 = Lack of borehole(s), 12 = Population increase, 13 = Rainfall pattern or distribution decrease, 14 = Lack of borehole maintenance or cooperation, 15 = If additional water sources (excluding boreholes) not increased, 16 = Other. If Decrease: 21 = More boreholes or expectation of more boreholes, 22 = Formal and informal laws or norms preventing disputes, 23 = More …
	z30a_d2	Second explanation for future disputes reported.
	z30a_y1	First explanation for future disputes reported.
	z30a_y2	Second explanation for future disputes reported.
31	Anxiety_HH	Is water a source of anxiety for your household?	Yes, No	1,0
	Anxiety_HHV	Is water a source of anxiety for your household?	1 = Yes 0 = No	1,0
31a	HH_Explain	Explain [open ended]	Word for word
	z31a_d1	First explanation for household anxiety and water.	0 = No response; If Yes: 11 = Insufficient water access during dry season, 12 = Distance to water source (far; all sources included), 13 = Population increase, 14 = No or not enough safe or clean water source, 15 = No or not enough boreholes, 16 = Other, 17 = Rainfall decrease; If No: 1 = Proximity to borehole (near), 2 = Private or personal water source, 3 = Sufficient communal water resources, …
	z31a_d2	Second explanation for household anxiety and water.
	z31a_y1	First explanation for household anxiety and water.
	z31a_y2	Second explanation for household anxiety and water.
32	Anixiety_Community	Is water a source of anxiety in your community?	Yes, No	1,0
	Anixiety_CommunityV	Is water a source of anxiety in your community?	1 = Yes 0 = No	1,0
32a	Community_Explain	Explain [open ended]	Word for word
	z32a_d1	First explanation for community anxiety and water.	0 = No response; If Yes: 11 = Insufficient water access during dry season, 12 = Distance to water source (far; all sources included), 13 = Population increase, 14 = No or not enough safe or clean water source, 15 = No or not enough boreholes, 16 = Other, 17 = Rainfall decrease; If No: 1 = Proximity to borehole (near), 2 = Private or personal water source, 3 = Sufficient communal water resources, …
	z32a_d2	Second explanation for community anxiety and water.
	z32a_y1	First explanation for community anxiety and water.
	z32a_y2	Second explanation for community anxiety and water.
33	Comments	Do you have any other comments that you would like to share with us about water issues and conflict in your life or in this area? [open ended]	Word for word
Variables created from open-ended questions
	Access	From Q8a: What are your main worries (kulibilika / mizezo)? General worries [open ended]	1 = Reported water access as a general worry, 0 = Did not report water access as a general worry
	farm_water	From Q8b: What are your main worries (kulibilika / mizezo)? Specific worries related to farming [open ended]	1 = Reported water for farming as a worry, 0 = Did not report water for farming as a worry
