# Supplementary material
Source: MDPI journal article supplement (https://www.mdpi.com/2071-1050/10/2/313)
Supplement: s1 [file s1 › S2 Survey Instrument.pdf]

**Indiana University and Zambian Agricultural Research Institute Farmer Survey**

Your answers are completely confidential and will not be identified in anyway. You may refuse to answer certain questions, or you could stop participating at any time.

Are you willing to participate in our study? \_\_\_\_ Yes \_\_\_\_ No

District: \_\_\_\_\_ Camp: \_\_\_\_\_ Zone: \_\_\_\_\_

Village: \_\_\_\_\_ Gender: \_\_\_\_\_ GPS: S \_\_\_\_\_ E \_\_\_\_\_

Zone Leader? \_\_\_\_ Yes \_\_\_\_ No Time of day: \_\_\_\_\_

1. What is your name? \_\_\_\_\_

a. What is your age? \_\_\_\_\_

b. What is your marital status? \_\_\_\_\_

c. What is your highest education level? \_\_\_\_\_

2. How long have you been your own farmer? \_\_\_\_\_

3. Since you have become your own farmer, when did you start farming here? \_\_\_\_\_

4. How many kilograms of maize seed did you plant in the last farming season? \_\_\_\_\_

5. How many cattle do you have? \_\_\_\_\_

6. How did you obtain the rights to the land you will cultivate this year? Check all that apply.

\_\_Purchased \_\_Inherited \_\_Rent or Lease \_\_Given by Headman (traditional rights)

\_\_Other: \_\_\_\_\_

7. How many household members usually eat at this residence? \_\_\_\_\_

8. What are your main worries (*kulibilika* / *mizezo*)?

a. General worries: \_\_\_\_\_  
\_\_\_\_\_

b. Specific worries related to farming: \_\_\_\_\_  
\_\_\_\_\_

9. How would you define conflict (*kuzwangana* / *kujumbana* / *kwimpana*)? \_\_\_\_\_

\_\_\_\_\_  
\_\_\_\_\_

10. Based on your definition, have you observed conflict around your area in the past ten years?  
 \_\_\_\_ Yes \_\_\_\_ No [If no, skip to Q11]

a. What were the sources of the conflict you observed (please be specific)? \_\_\_\_\_

\_\_\_\_\_

b. How did the conflict manifest (*cakalitondezya buti*)? \_\_\_\_\_

\_\_\_\_\_

c. How did this this source of conflict affect you? \_\_\_\_\_

\_\_\_\_\_

d. How did this source of conflict affect your community? \_\_\_\_\_

\_\_\_\_\_

11. Based on your definition, do you expect any forms of conflict around your area in the next ten years? \_\_\_\_ Yes \_\_\_\_ No [If no, skip to Q12]

a. What do you think will be the source of this conflict (please be specific)? \_\_\_\_\_

\_\_\_\_\_

b. How do you expect conflict to manifest (*ciyolitondezya buti*)? \_\_\_\_\_

\_\_\_\_\_

12. Do you expect any physical violence in the next ten years? \_\_\_\_ Yes \_\_\_\_ No

a. If yes, please explain: \_\_\_\_\_

**Now let's talk about water.**

13. How much water does your household use for all domestic activities per day?

\_\_\_\_\_ Liters per day. (Assume one bucket is 20L, how many buckets?)

14. Have you ever shared water with your neighbors? \_\_\_\_ Yes \_\_\_\_ No [If no, skip to Q15]

a. If yes, how often? \_\_\_\_\_

b. If yes, how much water was shared on that occasion? \_\_\_\_\_

15. Have you ever asked for water from your neighbors? \_\_\_\_Yes \_\_\_\_No [If no, skip to Q16]

a. Have you ever asked for water and your neighbor refused? \_\_\_\_Yes \_\_\_\_No

b. If yes, explain: \_\_\_\_\_

16. What are your main sources of water? Check all that apply.

| Comm. Borehole | Private Borehole | Comm. Well | Private Well | Dam | Pond | Tap | River or Stream | Other: _____ |
|----------------|------------------|------------|--------------|-----|------|-----|-----------------|--------------|
|                |                  |            |              |     |      |     |                 |              |

17. Does the water you use have to be fetched? \_\_\_\_Yes \_\_\_\_No [If no, skip to 18]

a. How long does it take to travel to your main source of water one-way? \_\_\_\_\_minutes

b. What modes of transport are used to fetch the water? \_\_\_\_\_

c. How many round trips are made per day? \_\_\_\_\_

d. What is the longest time your household member had to wait in line to fetch water?  
\_\_\_\_\_ minutes

18. Do you have any forms of water storage? \_\_\_\_Yes \_\_\_\_No [If no, skip to 19]

a. What are the sizes of the main water storage containers that you have? [Fill in table]

b. For each size, how many do you have of each? [Fill in table]

|                                |  |  |  |  |
|--------------------------------|--|--|--|--|
| Types of storage:              |  |  |  |  |
| Total number of storage units: |  |  |  |  |

19. Do you currently treat your drinking water? \_\_\_\_Yes \_\_\_\_No [If no, skip to 20]

(Ino mujaya buti tuuka twamumeenda akunywa?)

a. If yes, how? \_\_\_\_\_

20. Have you or any of your family members ever become sick from drinking water?

\_\_\_\_Yes \_\_\_\_No [If no, skip to Q21]

a. What water source do you believe caused the sickness? \_\_\_\_\_

b. When did the sickness occur? \_\_\_\_\_

c. What were the symptoms of the sickness? \_\_\_\_\_

d. How was the sickness treated? \_\_\_\_\_

21. Now let's talk about your **domestic household water needs:**

|                                                                                    | YES | NO |
|------------------------------------------------------------------------------------|-----|----|
| Have you had enough water <i>in the past ten years</i>                             |     |    |
| Have you had enough water <i>this year</i>                                         |     |    |
| Based on your experience, do you think you will have enough water <i>next year</i> |     |    |

22. [If no cattle, skip to 23] Now let's talk about your **cattle water needs:**

|                                                                                    | YES | NO |
|------------------------------------------------------------------------------------|-----|----|
| Have you had enough water <i>in the past ten years</i>                             |     |    |
| Have you had enough water <i>this year</i>                                         |     |    |
| Based on your experience, do you think you will have enough water <i>next year</i> |     |    |

23. Now let's talk about your **field crop water needs:**

|                                                                                      | YES | NO |
|--------------------------------------------------------------------------------------|-----|----|
| Have you had enough water <i>in the past ten years</i>                               |     |    |
| Have you had enough water <i>this past growing season (2014-15)</i>                  |     |    |
| Based on your experience, do you think you will have enough water <i>next season</i> |     |    |

a. *In the past five years*, did you have to ration your food for your household members?

\_\_\_\_ Yes \_\_\_\_ No [If no, skip to Q24]

b. If yes, explain why: \_\_\_\_\_

c. If yes, explain how: \_\_\_\_\_

**Now let's talk about rainfall in this area.**

24. *In the past ten years*, how has the annual amount of rainfall changed?

\_\_\_\_ Increased rainfall \_\_\_\_ Decreased rainfall \_\_\_\_ No change in rainfall

25. *Next year*, how do you think the annual rainfall amount will be compared to last year?

\_\_\_\_ Increased rainfall \_\_\_\_ Decreased rainfall \_\_\_\_ No change in rainfall

26. *In the past ten years*, how has the rainfall distribution changed during the growing season?

---



---

27. In the past ten years, how sure have you been about when the rains will start?

\_\_\_\_\_ Not sure \_\_\_\_\_ Sure

a. Explain: \_\_\_\_\_

28. Do you attend community meetings where water issues are discussed? \_\_\_\_\_ Yes \_\_\_\_\_ No

[If no, skip to Q29]

a. What are the main issues discussed? \_\_\_\_\_

\_\_\_\_\_

b. How often are these meetings held? \_\_\_\_\_

29. In past ten years, have you ever observed any disputes over water? \_\_\_\_\_ Yes \_\_\_\_\_ No

a. Explain: \_\_\_\_\_

\_\_\_\_\_

b. [If no, skip to Q30] How do people usually resolve the disputes? \_\_\_\_\_

\_\_\_\_\_

30. In the next ten years, how do you expect the number of disputes over water to change?

\_\_\_\_\_ Increase in disputes \_\_\_\_\_ Decrease in disputes \_\_\_\_\_ No change in disputes

a. Please explain: \_\_\_\_\_

31. Is water a source of anxiety for your household? \_\_\_\_\_ Yes \_\_\_\_\_ No

(Hena meenda amupakutaliba alubuwa)

a. Explain: \_\_\_\_\_

32. Is water a source of anxiety in your community? \_\_\_\_\_ Yes \_\_\_\_\_ No

(Hena meenda amupakutaliba mumuzi muno)

a. Explain: \_\_\_\_\_

33. Do you have any other comments that you would like to share with us about water issues and conflict in your life or in this area?

\_\_\_\_\_

\_\_\_\_\_

**Thank you for your time and responses.**
